# Supplementary material for: Cohort profile: the South African National Health Laboratory Service (NHLS) National HIV Cohort
Source: PubMed Central journal article supplement — BMJ Open. 2022 Oct 19;12(10):e066671. doi: 10.1136/bmjopen-2022-066671 (PMC9582381; doi:10.1136/bmjopen-2022-066671), 2022-10-19
Supplement: bmjopen-2022-066671.draft_revisions.pdf [file bmjopen-2022-066671.draft_revisions.pdf]

# BMJ Open

BMJ Open is committed to open peer review. As part of this commitment we make the peer review history of every article we publish publicly available.

When an article is published we post the peer reviewers' comments and the authors' responses online. We also post the versions of the paper that were used during peer review. These are the versions that the peer review comments apply to.

The versions of the paper that follow are the versions that were submitted during the peer review process. They are not the versions of record or the final published versions. They should not be cited or distributed as the published version of this manuscript.

BMJ Open is an open access journal and the full, final, typeset and author-corrected version of record of the manuscript is available on our site with no access controls, subscription charges or pay-per-view fees (<http://bmjopen.bmj.com>).

If you have any questions on BMJ Open's open peer review process please email [info.bmjopen@bmj.com](mailto:info.bmjopen@bmj.com)

# BMJ Open

## Cohort Profile: The South African National Health Laboratory Service (NHLS) National HIV Cohort

|                               |                                                                                                                                                                                                                                                                                                                                                                                                                                                                                                                                                                                                                                                                                                                                                                                                                                                                                                                                                                                                                                                                                                                                                                                                                                                                                                                                                                                                                                                                                                                                                                                                                                         |
|-------------------------------|-----------------------------------------------------------------------------------------------------------------------------------------------------------------------------------------------------------------------------------------------------------------------------------------------------------------------------------------------------------------------------------------------------------------------------------------------------------------------------------------------------------------------------------------------------------------------------------------------------------------------------------------------------------------------------------------------------------------------------------------------------------------------------------------------------------------------------------------------------------------------------------------------------------------------------------------------------------------------------------------------------------------------------------------------------------------------------------------------------------------------------------------------------------------------------------------------------------------------------------------------------------------------------------------------------------------------------------------------------------------------------------------------------------------------------------------------------------------------------------------------------------------------------------------------------------------------------------------------------------------------------------------|
| Journal:                      | <i>BMJ Open</i>                                                                                                                                                                                                                                                                                                                                                                                                                                                                                                                                                                                                                                                                                                                                                                                                                                                                                                                                                                                                                                                                                                                                                                                                                                                                                                                                                                                                                                                                                                                                                                                                                         |
| Manuscript ID                 | bmjopen-2022-066671                                                                                                                                                                                                                                                                                                                                                                                                                                                                                                                                                                                                                                                                                                                                                                                                                                                                                                                                                                                                                                                                                                                                                                                                                                                                                                                                                                                                                                                                                                                                                                                                                     |
| Article Type:                 | Cohort profile                                                                                                                                                                                                                                                                                                                                                                                                                                                                                                                                                                                                                                                                                                                                                                                                                                                                                                                                                                                                                                                                                                                                                                                                                                                                                                                                                                                                                                                                                                                                                                                                                          |
| Date Submitted by the Author: | 14-Jul-2022                                                                                                                                                                                                                                                                                                                                                                                                                                                                                                                                                                                                                                                                                                                                                                                                                                                                                                                                                                                                                                                                                                                                                                                                                                                                                                                                                                                                                                                                                                                                                                                                                             |
| Complete List of Authors:     | <p>MacLeod, William; Boston University School of Public Health, Department of Global Health; University of the Witwatersrand, Health Economics and Epidemiology Research Office</p> <p>Bor, Jacob; Boston University School of Public Health, Departments of Global Health and Epidemiology; Boston University School of Public Health, Department of Global Health</p> <p>Candy, Sue; National Institute for Communicable Diseases</p> <p>Maskew, Mhairi; University of the Witwatersrand, Health Economics and Epidemiology Research Office</p> <p>Fox, Matthew; Boston University School of Public Health, Departments of Global Health and Epidemiology; University of the Witwatersrand, Health Economics and Epidemiology Research Office</p> <p>Bulekova, Katia; Boston University</p> <p>Brennan, Alana; Boston University School of Public Health, Departments of Global Health and Epidemiology; University of the Witwatersrand, Health Economics and Epidemiology Research Office</p> <p>Potter, James; Boston University School of Public Health, Department of Global Health</p> <p>Natthey, Cornelius; University of the Witwatersrand, Health Economics and Epidemiology Research Office</p> <p>Onoya, Dorina; University of the Witwatersrand, Health Economics and Epidemiology Research Office</p> <p>Mlisana, Koleka; National Health Laboratory Service</p> <p>Stevens, Wendy; University of the Witwatersrand, Department of Molecular Medicine and Haematology; National Health Laboratory Service</p> <p>Carmona, Sergio; University of the Witwatersrand, Department of Molecular Medicine and Haematology</p> |
| Keywords:                     | HIV & AIDS < INFECTIOUS DISEASES, Public health < INFECTIOUS DISEASES, EPIDEMIOLOGY                                                                                                                                                                                                                                                                                                                                                                                                                                                                                                                                                                                                                                                                                                                                                                                                                                                                                                                                                                                                                                                                                                                                                                                                                                                                                                                                                                                                                                                                                                                                                     |
|                               |                                                                                                                                                                                                                                                                                                                                                                                                                                                                                                                                                                                                                                                                                                                                                                                                                                                                                                                                                                                                                                                                                                                                                                                                                                                                                                                                                                                                                                                                                                                                                                                                                                         |

SCHOLARONE™  
Manuscripts

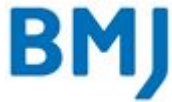

I, the Submitting Author has the right to grant and does grant on behalf of all authors of the Work (as defined in the below author licence), an exclusive licence and/or a non-exclusive licence for contributions from authors who are: i) UK Crown employees; ii) where BMJ has agreed a CC-BY licence shall apply, and/or iii) in accordance with the terms applicable for US Federal Government officers or employees acting as part of their official duties; on a worldwide, perpetual, irrevocable, royalty-free basis to BMJ Publishing Group Ltd ("BMJ") its licensees and where the relevant Journal is co-owned by BMJ to the co-owners of the Journal, to publish the Work in this journal and any other BMJ products and to exploit all rights, as set out in our [licence](#).

The Submitting Author accepts and understands that any supply made under these terms is made by BMJ to the Submitting Author unless you are acting as an employee on behalf of your employer or a postgraduate student of an affiliated institution which is paying any applicable article publishing charge ("APC") for Open Access articles. Where the Submitting Author wishes to make the Work available on an Open Access basis (and intends to pay the relevant APC), the terms of reuse of such Open Access shall be governed by a Creative Commons licence – details of these licences and which [Creative Commons](#) licence will apply to this Work are set out in our licence referred to above.

Other than as permitted in any relevant BMJ Author's Self Archiving Policies, I confirm this Work has not been accepted for publication elsewhere, is not being considered for publication elsewhere and does not duplicate material already published. I confirm all authors consent to publication of this Work and authorise the granting of this licence.

## Cohort Profile: The South African National Health Laboratory Service (NHLS)

### National HIV Cohort

William B. MacLeod<sup>1,2,†,\*</sup>, Jacob Bor<sup>1,2,3,†</sup>, Sue Candy<sup>4</sup>, Mhairi Maskew<sup>2</sup>, Matthew P. Fox<sup>1,2,3</sup>, Katia Bulekova<sup>5</sup>, Alana T. Brennan<sup>1,2,3</sup>, James Potter,<sup>1</sup> Cornelius Nattey<sup>2</sup>, Dorina Onoya<sup>2</sup>, Koleka Mlisana<sup>6</sup>, Wendy Stevens<sup>6,7</sup>, Sergio Carmona<sup>7</sup>

#### Affiliations:

<sup>1</sup>Department of Global Health, Boston University School of Public Health, Boston, MA, USA

<sup>2</sup>Health Economics and Epidemiology Research Office, University of the Witwatersrand, Johannesburg, South Africa

<sup>3</sup>Department of Epidemiology, Boston University School of Public Health, Boston, MA, USA

<sup>4</sup>National Institute of Communicable Diseases, Sandringham, South Africa

<sup>5</sup>Research Computing Services, Boston University, USA

<sup>6</sup>National Health Laboratory Service, Sandringham, South Africa

<sup>7</sup>Department of Molecular Medicine and Haematology, University of the Witwatersrand School of Pathology, Johannesburg, South Africa

\*correspondence to: [wmacleod@bu.edu](mailto:wmacleod@bu.edu), 801 Massachusetts Avenue, 3<sup>rd</sup> Floor, Boston, MA 02118

†equal contributions

**Short title:** Cohort Profile: South Africa's NHLS National HIV Cohort

## Abstract

- **Purpose:** South Africa's National Health Laboratory Service (NHLS) National HIV Cohort was established in 2015 to facilitate monitoring, evaluation, and research on South Africa's National HIV Treatment Program. In South Africa, 84.8% of PLHIV know their HIV status, 70.7% are on ART, and 87.4% are virologically suppressed.
- **Participants:** The NHLS National HIV Cohort includes the laboratory data of nearly all patients receiving HIV care in the public sector since April 2004. Patients are included in the cohort if they have received a CD4 count or HIV RNA viral load test. Using an anonymized unique patient identifier that we developed and validated to linked test results, patients are observed prospectively through their laboratory results as they receive HIV care and treatment. Patients in HIV care are seen for laboratory monitoring every 6 to 12 months. Data collected include age, sex, facility location, and test results for CD4 counts, viral loads, and laboratory tests used to screen for potential treatment complications.
- **Findings to date:** From April 2004 through April 2018, 63 million CD4 count and viral load tests were conducted at 5,483 facilities. 12.6 million unique patients had at least one CD4 count or viral load, indicating they had accessed HIV care, and 7.1 million patients received a viral load test indicating they had started ART. The creation of NHLS National HIV Cohort has enabled longitudinal research on all lab-monitored patients in South Africa's national HIV program, including analyses of: 1) patient health at presentation; 2) care outcomes such as "CD4 recovery", "retention in care", and "viral re-suppression"; 3) patterns of transfer and re-entry into care; 4) facility-level variation in care outcomes; and 5) impacts of policies and guideline changes.
- **Future plans:** Continuous updating of the cohort, integration with available clinical data, and expansion to include tuberculosis and other lab-monitored comorbidities.

## STRENGTHS AND LIMITATIONS

### *Strengths*

- Large size and scope—all public sector patients in South Africa.
- We are able to explore outcomes without the problem of silent transfers.
- The cohort contains patient data prior to the initiation of ART: essential for assessing the impact of policy changes on outcomes both before and after treatment.

### *Limitations*

- It is limited to laboratory results with limited demographic information and no clinical visit or pharmacy information.
- The laboratory data doesn't have a unique patient identifier and the matching techniques we use are not perfect and lead to both over- and under-matching of patient records, which potentially could lead to biased findings.

## INTRODUCTION

South Africa has the largest HIV treatment program in the world, with over 4.7 million people currently on antiretroviral therapy (ART).<sup>1</sup> It also has the largest number of people living with HIV but not yet on ART, an estimated 3 million people.<sup>1</sup> Based on the fifth South African national HIV sero-behavioural survey conducted in 2017, 84.8% of people living with HIV were aware of their status, 70.7% were on ART, and 87.4% were virologically suppressed.<sup>2</sup> With such high stakes, it is critical to evaluate the impact of the ART program and improve outcomes nationally.

South Africa's National Health Laboratory Service (NHLS) National HIV Cohort was established to facilitate monitoring, evaluation, and research on South Africa's National HIV Care and Treatment Program. The NHLS National HIV Cohort includes the laboratory data of nearly all patients receiving HIV care in the public sector since 2004. Using an anonymized unique patient identifier that we developed and validated, patients can be followed longitudinally through their laboratory results as they progress through the HIV care and treatment cascade. This open, prospective cohort can be used to evaluate changes in HIV treatment guidelines, to assess trends in patient outcomes across space and time, to determine patterns of patient transfer, and to identify areas where outcomes lag behind.

South Africa has conducted a series of five national population-based HIV biomarker surveys since 2002 and a large number of HIV treatment cohorts have been established in South Africa. Analyses of these surveys and cohorts have contributed to our knowledge of HIV treatment outcomes.<sup>2-12</sup> However, the national surveys are only conducted every 4 or 5 years, and the existing cohorts while continuous, also have some drawbacks: they are not nationally

1  
2  
3 representative, most are in urban areas, and reflect long-standing research collaborations that  
4  
5 have resulted in better-than-average patient care. Further, existing cohorts do not  
6  
7 systematically track patients lost to follow-up in order to assess re-engagement in care.  
8  
9

10 TIER.net, the country's HIV patient monitoring platform, is national in scope but has limited  
11  
12 ability to track patients across sites<sup>13</sup>. While collecting data on all HIV patients nationally would  
13  
14 be prohibitively expensive as a research endeavor, routine laboratory data collected in South  
15  
16 Africa's HIV program can be leveraged to construct a cohort for monitoring, evaluation, and  
17  
18 research.<sup>14,15</sup>  
19  
20  
21  
22

23 Since the beginning of the national HIV care and treatment program, NHLS provided nearly all  
24  
25 laboratory testing for the public-sector program (with the exception of KwaZulu Natal Province  
26  
27 which was not fully integrated into NHLS until April 2010). Laboratory testing has been used for  
28  
29 CD4 and VL monitoring, for confirmatory HIV diagnostic testing, and to identify potential ART  
30  
31 complications and contraindications. Specimens for testing are collected from patients at their  
32  
33 care facility and sent to one of 16 laboratories for processing and testing. Results are generated  
34  
35 by testing instruments in real time and sent to the NHLS Corporate Data Warehouse (CDW)  
36  
37 which manages the distribution of results in real-time. All laboratory test results are maintained  
38  
39 within the CDW. All NHLS HIV labs are accredited by the South African National Accreditation  
40  
41 System (SANAS). The NHLS supports the labs with training, site visits, and on-site audits.  
42  
43  
44 Standard operating procedures have been developed and distributed to ensure standardisation  
45  
46 across testing facilities. Laboratory performance on test volumes and turn-around-times are  
47  
48 routinely monitored<sup>16</sup>.  
49  
50  
51  
52  
53  
54  
55  
56  
57  
58  
59  
60

1  
2  
3  
4  
5  
6  
7 The NHLS National HIV Cohort has advantages over clinical cohorts. First, the data come directly  
8  
9 from the source testing platforms and are less vulnerable to data entry errors that occur when  
10  
11 extracting patient charts into databases. Second, the data are lower cost as they are collected  
12  
13 for routine patient care. Third, the cohort offers a system-wide perspective on the national  
14  
15 program in which transfers, drop-out, and re-entry into care can be observed, enabling  
16  
17 evidence generation around national policy decisions. Fourth, the dataset size means that  
18  
19 evaluations are robust and can be used to compare facilities, geographic areas, and  
20  
21 demographic sub-groups. Fifth, because the data reflect all lab-monitored HIV patients  
22  
23 receiving care in the public sector, the cohort reflects public-sector care-seeking patterns.  
24  
25  
26  
27  
28

## 29 **COHORT DESCRIPTION**

### 31 **Participants in the cohort**

32  
33  
34  
35  
36 The NHLS National HIV Cohort includes all patients presenting for HIV care or treatment and  
37  
38 receiving CD4 and/or HIV viral load (VL) monitoring at nearly all government health facilities in  
39  
40 South Africa, from April 2004 through April 2018. During this period, 63 million CD4 and VL tests  
41  
42 were conducted at 5,483 facilities.  
43  
44  
45

46  
47 A longitudinal cohort requires a patient identifier in order to follow patients over time. National  
48  
49 ID numbers were only available for 2% of the specimens. However, the database contained  
50  
51 sufficient information to link laboratory records to individual patients using probabilistic  
52  
53 matching techniques. We developed a record linkage algorithm to identify unique patients in  
54  
55  
56  
57  
58  
59  
60



1  
2  
3 the NHLS database combining elements of probabilistic linkage approaches with concepts from  
4  
5 network analysis.<sup>17-19</sup> The methodology is reported in detail elsewhere.<sup>20</sup> In the absence of a  
6  
7 true gold standard, we constructed manually-coded datasets for training and validation. We  
8  
9 manually reviewed 58,905 candidate matches of 1,000 randomly sampled laboratory records.  
10  
11 Relative to these manually-coded data, the algorithm had 93.7% sensitivity, indicating that the  
12  
13 algorithm identified all but 6.3% of true matches. The algorithm had 98.6% positive predictive  
14  
15 value, indicating that just 1.4% of algorithm-assigned matches were incorrect. Additionally, for  
16  
17 those specimens linked to a National ID number, the algorithm correctly identified pairs of  
18  
19 records with the same National ID number with 98.5% sensitivity. No linkage is perfect. For  
20  
21 example, patients may present to clinics with different names and dates of birth, in which case  
22  
23 linkage would be impossible. However, we developed a high-performing linkage approach using  
24  
25 the available data in the NHLS database. By creating a validated patient identifier, the linkage  
26  
27 enabled analysis of the NHLS database as an HIV Cohort. The cohort was deidentified after  
28  
29 linkage, and all analyses are conducted using anonymized data.  
30  
31  
32  
33  
34  
35  
36  
37

38 Our record linkage of the CDW data was conducted on 152.5 million total laboratory results  
39  
40 including 63 million CD4 counts and VL from April 2004 through April 2018. The algorithm  
41  
42 assigned these laboratory results to 12,603,979 unique patients with at least one CD4 count or  
43  
44 VL, indicating that these individuals had accessed HIV care. **Table 1** shows the demographics of  
45  
46 the cohort. The cohort was 64.3% female, 33.7% male, and 2.0% unknown gender. The majority  
47  
48 of individuals were 20-49 years old (8.4% had an unknown date of birth), with patients entering  
49  
50 the cohort at a median age of 32 years (IQR 25-41 years). In the most recent 12 months of the  
51  
52 cohort, HIV patients had laboratory tests at 4,751 facilities within South Africa (**Figure 1**).  
53  
54  
55  
56  
57  
58  
59  
60

**Table 1. Sex and age of patients entering into HIV Care from May 2004 to April 2018.**

| Parameter (% (n)) | May 2004<br>to April 2008<br>(n=2,042,315) | May 2008<br>to April 2013<br>(n=5,752,084) | May 2013<br>to April 2018<br>(n=4,809,580) | May 2004<br>to April 2018<br>(n=12,603,979) |
|-------------------|--------------------------------------------|--------------------------------------------|--------------------------------------------|---------------------------------------------|
| Male              | 31.4% (641,534)                            | 32.4% (1,864,287)                          | 36.2% (1,741,698)                          | 33.7% (4,247,519)                           |
| Female            | 66.3% (1,354,605)                          | 65.9% (3,792,924)                          | 61.6% (2,962,984)                          | 64.3% (8,110,513)                           |
| Unknown           | 2.3% (46,176)                              | 1.6% (94,873)                              | 2.2% (104,898)                             | 2.0% (245,947)                              |
| Age Group (years) |                                            |                                            |                                            |                                             |
| 0-4               | 3.5% (71,011)                              | 2.8% (162,706)                             | 2.3% (111,735)                             | 2.7% (345,452)                              |
| 5-9               | 1.4% (28,358)                              | 1.4% (78,910)                              | 1.0% (49,771)                              | 1.2% (157,039)                              |
| 10-14             | 0.6% (11,889)                              | 1.0% (60,280)                              | 1.1% (54,329)                              | 1.0% (126,498)                              |
| 15-19             | 2.8% (57,167)                              | 3.8% (216,482)                             | 4.4% (211,731)                             | 3.9% (485,380)                              |
| 20-24             | 11.2% (229,680)                            | 11.5% (662,334)                            | 11.5% (551,815)                            | 11.5% (1,443,829)                           |
| 25-29             | 17.7% (360,484)                            | 16.8% (965,872)                            | 15.6% (751,784)                            | 16.5% (2,078,140)                           |
| 30-34             | 18.3% (374,633)                            | 15.9% (917,420)                            | 15.7% (755,664)                            | 16.2% (2,047,717)                           |
| 35-39             | 14.1% (287,302)                            | 13.3% (763,369)                            | 12.4% (597,389)                            | 13.1% (1,648,060)                           |
| 40-44             | 9.9% (202,827)                             | 9.2% (530,075)                             | 9.3% (448,095)                             | 9.4% (1,180,997)                            |
| 45-49             | 6.4% (131,450)                             | 6.5% (375,617)                             | 6.4% (310,034)                             | 6.5% (817,101)                              |
| 50-54             | 3.9% (79,764)                              | 4.2% (242,140)                             | 4.6% (221,419)                             | 4.3% (543,323)                              |
| 55-59             | 2.0% (41,344)                              | 2.5% (144,966)                             | 3.0% (144,236)                             | 2.6% (330,546)                              |
| 60-64             | 0.9% (17,757)                              | 1.3% (73,998)                              | 1.8% (85,267)                              | 1.4% (177,022)                              |
| 65+               | 0.4% (8,772)                               | 0.6% (33,536)                              | 0.8% (40,675)                              | 0.7% (82,983)                               |

Age is age at first entry into HIV Care--at first CD4 or first VL test.

Of the 12.6 million patients in the cohort, 7.1 million ever initiated ART. To estimate the number of patients currently receiving ART, we limited the cohort to the last 18 months from

1  
2  
3 November 2016 through April 2018. We estimate there were 4.4 million patients receiving ART  
4  
5 as evidenced by VL monitoring during that time period, similar to the 4.7 million on ART  
6  
7 UNAIDS estimated for 2018.<sup>21</sup> The number of patients entering HIV care, initiating HIV  
8  
9 treatment, and actively on HIV treatment by year is shown in **Table 2**. Since 2004-05 the  
10  
11 number with a first VL (a proxy for initiating HIV treatment, in South Africa, only patients on  
12  
13 ART are monitored virologically) has grown from 27,937 to 913,604 per year.  
14  
15

16  
17 We found 4.2 million CD4 and 592,261 VL tests that were unlinked to other tests. Patients in  
18  
19 the cohort that had just a single CD4 and no VL include the large number of patients who  
20  
21 present clinically with HIV, have blood drawn for a CD4, but do not seek follow-up care. Still,  
22  
23 some of these singleton lab results may be “stray” lab results that should have been linked to a  
24  
25 patient. Singleton VL represent 8.3% of all VL tests.  
26  
27  
28  
29

### 30 31 **Participant Follow-Up**

32  
33 In South Africa, as in many countries, HIV care and treatment decisions are informed by routine  
34  
35 laboratory monitoring, as specified in standardized national guidelines.<sup>22</sup> While the cohort lacks  
36  
37 information on clinical visits, pharmacy data, or ART regimen, it is nevertheless possible to  
38  
39 follow important care and treatment decisions through the labs.  
40  
41  
42  
43  
44

45  
46 Within the cohort, follow-up is determined by the dates of CD4 and VL monitoring, as well as  
47  
48 screening for potential treatment complications, known as the ART work-up. Laboratory-based  
49  
50 monitoring of CD4 and VL has been a standard component of national HIV care and treatment  
51  
52  
53  
54  
55  
56  
57  
58  
59  
60

**Table 2. Number of patients entering into HIV Care, receiving first HIV VL test, on ART, and HIV VL suppressed by 12-month period from May 2004 to April 2018.**

| Year (12-month period May 1 to April 30) | Number of patients entering into HIV Care <sup>a</sup> | Number of patients receiving first HIV VL test <sup>b</sup> | Number of patients on ART <sup>c</sup> | Percent HIV VL suppressed <sup>d</sup> |
|------------------------------------------|--------------------------------------------------------|-------------------------------------------------------------|----------------------------------------|----------------------------------------|
| 2004-05                                  | 118,829                                                | 27,937                                                      | 24,208                                 | 31.1                                   |
| 2005-06                                  | 219,942                                                | 111,865                                                     | 120,796                                | 39.4                                   |
| 2006-07                                  | 302,510                                                | 176,979                                                     | 272,078                                | 43.4                                   |
| 2007-08                                  | 344,935                                                | 223,188                                                     | 420,542                                | 50.3                                   |
| 2008-09                                  | 410,563                                                | 283,929                                                     | 609,729                                | 55.4                                   |
| 2009-10                                  | 479,406                                                | 249,971                                                     | 716,555                                | 65.7                                   |
| 2010-11                                  | 915,898                                                | 525,457                                                     | 1,066,016                              | 72.3                                   |
| 2011-12                                  | 713,101                                                | 582,175                                                     | 1,465,428                              | 72.2                                   |
| 2012-13                                  | 626,296                                                | 672,543                                                     | 1,875,968                              | 74.0                                   |
| 2013-14                                  | 619,396                                                | 715,786                                                     | 2,316,959                              | 74.6                                   |
| 2014-15                                  | 629,246                                                | 785,503                                                     | 2,801,889                              | 77.1                                   |
| 2015-16                                  | 666,492                                                | 952,256                                                     | 3,429,148                              | 79.6                                   |
| 2016-17                                  | 629,754                                                | 919,229                                                     | 3,951,406                              | 79.4                                   |
| 2017-18                                  | 461,076                                                | 913,604                                                     | 4,419,017                              | 83.2                                   |

<sup>a</sup>Numbers of patients into HIV Care is the number of patients with a first CD4 or first VL.

<sup>b</sup>Number of patients receiving first HIV VL test is the number of first of VL tests

<sup>c</sup>Number of patients on ART is the number of patients who had a VL test in the 18-month period from November 1, (year – 1) to April 30, (year + 1).

<sup>d</sup>Percent of HIV VL suppressed are  $100 \times (\text{the number of VL} < 400 \text{ cp/ml} / \text{Total number of VL tests})$  during the same 18-month period. Patients who did not receive a viral load test are not included.

1  
2  
3 guidelines during the period of study and a routine part of clinical care. During the period of  
4  
5 observation, patients testing positive for HIV at a health facility have blood drawn for a CD4 on  
6  
7 the same day or shortly thereafter. Thus, a patient's first CD4 test is a reasonable proxy for the  
8  
9 date when a patient was diagnosed as HIV-infected within the health system and presented to  
10  
11 a health facility. At the start of the HIV care program, VL tests were conducted at treatment  
12  
13 initiation, and then every six-months. Since 2010, VL monitoring has been limited to 6- and 12-  
14  
15 months after treatment initiation and annually thereafter. **Table 3** lists the evolving criteria for  
16  
17 ART initiation and ART laboratory monitoring in South Africa from 2004 to 2016.  
18  
19

20  
21 Within the cohort, for patients on treatment, a total of 26.7 million follow-up VL have been  
22  
23 conducted which corresponds to a median (IQR) of 2 (1-5) VL per person. This translates to  
24  
25 23,381,315 total person years of follow-up on HIV treatment for a median (IQR) of 2.1 (1.0-5.0)  
26  
27 years per person.  
28  
29  
30  
31  
32  
33

### 34 **Variables measured**

35  
36 The variables in the NHLS National HIV Cohort are described in **Table 4** along with percent  
37  
38 completeness. The cohort includes the type of test, tests results, test date, and geographic  
39  
40 information along with patient's date of birth and sex. **Table 5** is a frequency listing of test type  
41  
42 by three time periods. The tests included in the cohort includes all CD4, VL, HIV confirmatory  
43  
44 tests (PCR/Elisa), and ART-workup labs for patients receiving HIV care.  
45  
46  
47  
48  
49

50  
51 Despite the lack of clinical and pharmacy data, the cohort can be used to generate a wealth of  
52  
53 information about the national HIV program. Information on facility can be linked to facility  
54  
55 geocodes, which can be mapped (**Figure 1**), aggregated to the local municipality, district, and  
56  
57  
58  
59  
60

**Table 3. Evolving criteria for ART initiation and ART monitoring in South Africa from 2004 to 2016.**

| Year | Guidelines                                                                                                                    | ART Initiation Criteria/CD4 and VL monitoring                                                                                                                                                                                                                                                                                                                                                                                                                                                                                                                                                                                                                                                                                                                                                  |
|------|-------------------------------------------------------------------------------------------------------------------------------|------------------------------------------------------------------------------------------------------------------------------------------------------------------------------------------------------------------------------------------------------------------------------------------------------------------------------------------------------------------------------------------------------------------------------------------------------------------------------------------------------------------------------------------------------------------------------------------------------------------------------------------------------------------------------------------------------------------------------------------------------------------------------------------------|
| 2004 | National ARV Treatment Guidelines (2004) <sup>23</sup>                                                                        | <p><i>Criteria for ART Initiation</i><br/>           CD4 &lt;200 cells/mm<sup>3</sup> irrespective of stage or WHO Stage IV AIDS-defining illness, irrespective of CD4 count and Patient expresses willingness and readiness to take ART adherently</p> <p><i>ART Monitoring</i><br/>           CD4: Staging and 6 monthly<br/>           VL: Staging and 6 monthly</p>                                                                                                                                                                                                                                                                                                                                                                                                                        |
| 2010 | The South African Antiretroviral Treatment Guidelines 2010 <sup>24</sup>                                                      | <p><i>Criteria for ART Initiation</i><br/>           CD4 count &lt;200cells/mm<sup>3</sup> irrespective of clinical stage or CD4 count &lt;350cells/mm<sup>3</sup> in patients with TB/HIV or Pregnant women or WHO stage IV irrespective of CD4 count or MDR/XDR irrespective of CD4<br/> <i>Require fast track (i.e. ART initiation within 2 weeks of being eligible)</i><br/>           Pregnant women eligible for lifelong ART; Patients with very low CD4 (&lt;100);<br/>           Stage 4, CD4 count not yet available, or;<br/>           MDR/XDR TB</p> <p><i>ART Monitoring</i><br/>           CD4: Staging, 6 and 12 months and annually thereafter<br/>           VL: 6 and 12 months and annually thereafter</p>                                                                 |
| 2011 | Circular on New Criteria for Initiation of Adults on ART at CD4 Count of 350 cells/mm <sup>3</sup> and below. August 26, 2011 | Baseline CD4 for initiation at CD4 < 350 cells/mm <sup>3</sup>                                                                                                                                                                                                                                                                                                                                                                                                                                                                                                                                                                                                                                                                                                                                 |
| 2012 | Accelerating Access to ART Services and Uptake (circular) April 17, 2012                                                      | <p><i>Criteria for ART Initiation</i><br/>           CD4 count &lt;350 cells/mm<sup>3</sup> irrespective of clinical stage or patients with TB/HIV irrespective of CD4 count or Pregnant women or WHO stage IV irrespective of CD4 count or MDR/XDR irrespective of CD4<br/> <i>Require fast track (i.e. Same day ART initiation)</i><br/>           Pregnant women eligible for lifelong ART; Patients with low CD4 (&lt;200);<br/>           Stage 4, CD4 count not yet available, or;<br/>           MDR/XDR TB<br/>           Screening and treatment of patients with very low CD4 Counts (&lt;100) for cryptococcal infection</p> <p><i>ART Monitoring</i><br/>           CD4: Staging, 12 months and annually thereafter<br/>           VL: 6 and 12 months and annually thereafter</p> |
| 2013 | The South African Antiretroviral Treatment Guidelines 2013 <sup>25</sup>                                                      | <p><i>Criteria for ART Initiation</i><br/>           CD4 count &lt;350 cells/mm<sup>3</sup> irrespective of WHO clinical stage or Irrespective of CD4 count and All types of TB (In patients with TB drug resistant or sensitive, including extra pulmonary TB) and WHO stage 3 or 4 irrespective of CD4 count<br/> <i>Require fast track (i.e. ART initiation within 7 days of being eligible)</i><br/>           HIV positive women who are pregnant or breast feeding or Patients with low CD4 &lt;200 or Patients with Stage 4, irrespective of CD4 count or Patients with TB/HIV co morbidity with CD4 count &lt; 50 (Patients</p>                                                                                                                                                        |

|      |                                                                                                                                                                                     |                                                                                                                                                                                                                                                                                                                                                                                                                                                                                                                                                                                       |
|------|-------------------------------------------------------------------------------------------------------------------------------------------------------------------------------------|---------------------------------------------------------------------------------------------------------------------------------------------------------------------------------------------------------------------------------------------------------------------------------------------------------------------------------------------------------------------------------------------------------------------------------------------------------------------------------------------------------------------------------------------------------------------------------------|
|      |                                                                                                                                                                                     | with Cryptococcus meningitis or TB meningitis (defer ART for 4-6 weeks)<br><i>ART Monitoring</i><br>CD4: Staging and 1 year<br>VL: 6 and 12 months and annually thereafter                                                                                                                                                                                                                                                                                                                                                                                                            |
| 2015 | National consolidated guidelines for the prevention of mother-to-child transmission of HIV (PMTCT) and the management of HIV in children, adolescents and adults 2015 <sup>26</sup> | <i>Criteria for ART Initiation</i><br>CD4 count <500 cells/mm <sup>3</sup> irrespective of WHO clinical stage or All types of TB or WHO stage 3 or 4 or HBV coinfection irrespective of CD4 count<br><i>Immediate Initiation</i><br>All HIV-positive pregnant or breastfeeding women, as long as no active TB<br><i>Require fast track (i.e. ART initiation within 7 days of being eligible)</i><br>Patients with low CD4 <200 or Patients with Stage 4, irrespective of CD4 count<br><i>ART Monitoring</i><br>CD4: Staging and 1 year<br>VL: 6 and 12 months and annually thereafter |
| 2016 | Circular on Implementation of the Universal Test and Treat Strategy for HIV Positive Patients and Differentiated Care for Stable Patients August 22, 2016 <sup>27</sup>             | <i>Criteria for ART Initiation</i><br>All HIV positive adolescents and adults regardless of CD4 count<br><i>ART Monitoring</i><br>CD4 Staging and 1 year.<br>VL monitoring at 6 and 12 months and annually thereafter.                                                                                                                                                                                                                                                                                                                                                                |

**Table 4. Variables in the NHLS National HIV Cohort**

| Variable           | Description                                          | Percent completeness of variable |
|--------------------|------------------------------------------------------|----------------------------------|
| BU_uniq_ID         | Unique patient identifier                            | 100%                             |
| Episode_no         | NHLS Episode identifier                              | 100%                             |
| Sex                | Sex                                                  | 98.0%                            |
| Age                | Age in years at testing date                         | 91.6%                            |
| Province           | Province of health facility where specimen was taken | 99.8%                            |
| District           | District of health facility                          | 99.8%                            |
| Local_Municipality | Local municipality of health facility                | 99.8%                            |
| Facility           | NHLS Facility Code of health facility                | 99.8%                            |
| Ward               | NHLS Ward Code of ward at health facility            | 99.8%                            |
| Test_name          | Type of test (e.g. CD4, VL)                          | 100%                             |
| Test_date          | Date of test                                         | 100%                             |
| Test_result        | Test result                                          | 100%                             |

**Table 5. Frequency of all tests included in the NHLS National HIV Cohort in three time periods, May 2004-April 2018**

| Name of Test               | Use in HIV care                                             | 2004-08   | 2008-13    | 2013-18    | All time periods |
|----------------------------|-------------------------------------------------------------|-----------|------------|------------|------------------|
| Alanine Aminotransferase   | Measure of liver injury and determining choice of ART       | 1,970,138 | 9,301,723  | 9,176,996  | 20,448,857       |
| CD4 Count                  | ART eligibility and disease progression                     | 3,599,594 | 15,483,376 | 17,578,415 | 36,661,385       |
| Serum Cryptococcal Antigen | To detect and prevent cryptococcal meningitis               | 17        | 71,374     | 1,017,903  | 1,089,294        |
| Creatinine Clearance       | Measure of kidney function and determining choice of ART    | 2,880     | 6,113,182  | 25,422,404 | 31,538,466       |
| HIV Elisa Confirmatory     | HIV diagnostic test primarily in infants and young children | 663,518   | 820,322    | 370,465    | 1,854,305        |
| HIV Elisa Screening        | HIV diagnostic test primarily in                            | 1,129,249 | 1,448,212  | 639,528    | 3,216,989        |



---

|    |                            |                                                                 |                   |                   |                   |                    |
|----|----------------------------|-----------------------------------------------------------------|-------------------|-------------------|-------------------|--------------------|
|    | infants and young children |                                                                 |                   |                   |                   |                    |
|    | children                   |                                                                 |                   |                   |                   |                    |
| 5  | Hemoglobin                 | Measure of overall health                                       | 3,841,090         | 12,318,399        | 14,260,748        | 30,420,237         |
| 8  | HIV PCR                    | HIV diagnostic test primarily used for HIV diagnosis in infants | 39,706            | 109,079           | 108,212           | 256,997            |
| 12 | HIV RNA Viral Load         | Monitoring efficacy of ART therapy                              | 1,120,821         | 6,716,430         | 18,922,454        | 26,759,705         |
| 17 | <b>Total</b>               |                                                                 | <b>12,367,013</b> | <b>52,382,097</b> | <b>87,497,125</b> | <b>152,246,235</b> |

---

For peer review only

1  
2  
3 provincial levels, or linked to external population-level data such as HIV prevalence, poverty  
4 levels, or the population age distribution. Information on test dates can be used to assess  
5  
6 longitudinal outcomes such as retention in care (18 months without a monitoring lab) at the  
7  
8 patient level, and to assess trends in patient outcomes over time.  
9  
10  
11  
12

### 13 14 **Participant attrition**

15  
16  
17 As in other passive surveillance cohorts<sup>5</sup>, attrition from care (and its inverse, “retention in  
18 care”) is a primary outcome of interest. Data are generated through lab monitoring as part of  
19 routine clinical care and no data are collected beyond what is clinically indicated. No efforts are  
20 made by the research team to retain patients in care nor to actively follow-up patients who  
21 have left care. However, accuracy of retention estimates are enhanced by the national  
22 perspective of the cohort which is robust to silent transfers. As the study population includes all  
23 people who have sought public sector care for HIV in South Africa, attrition occurs only if a  
24 person emigrates from South Africa and can no longer seek HIV care.  
25  
26  
27  
28  
29  
30  
31  
32  
33  
34  
35  
36

### 37 **FINDINGS TO DATE**

38  
39  
40 The ability to link laboratory results to create records of individual patients has enabled 1)  
41 longitudinal patient-level epidemiologic research for the complete national HIV care and  
42 treatment program including patients not yet on ART; 2) assessment of concepts such as “CD4  
43 recovery”, “retention in care”, and “viral re-suppression” that require individual-level  
44 longitudinal data and monitoring of these concepts at all public-sector facilities nationally; 3)  
45 tracking of patients as they seek care at different clinics within the health system and assessing  
46 patterns of transfer; 4) evaluation of policies and guideline changes. Finally, linkage with facility  
47  
48  
49  
50  
51  
52  
53  
54  
55  
56  
57  
58  
59  
60

geocodes has enabled integration of the cohort with publicly available data on outcomes and exposures at the facility or district level, including programmatic data (e.g. clinic staffing, size) and population-based data (e.g. population density, poverty, HIV prevalence, and mortality).

Key findings from the NHLS National HIV Cohort include the following:

- *Retention in HIV care is underestimated by not accounting for within system patient transfer* – Estimated retention in HIV care from both the initiating clinic and a national perspective. At the clinic level retention in care was 29.1% by 6 years. However, when accounting for transfers to other clinics, retention in care was 63.3% by 6 years.<sup>28</sup>
- *There is large spatial heterogeneity in the HIV care cascade* – Estimated rates of VL testing and suppression from April 2014 through March 2015 across public facilities. We identified wide spatial variation in VL suppression, ranging from 69 to 82% at the provincial level.<sup>29</sup> **Figure 2** shows a map of district level estimates of VL suppression. The cohort was also used to develop a summary measure of quality of care at the facility level based on patients' longitudinal outcomes in different facilities. Year-to-year, quality was found to be highly correlated within facilities, but varied widely across facilities.<sup>30</sup>
- *A high proportion of patients present with advanced disease* – Documented that a consistently large share (~33%) of patients entered into care with a CD4 <200 cells/uL from 2011 to 2016 despite increased CD4 treatment eligibility standards.<sup>31</sup> Late presentation persisted into the UTT era.<sup>32</sup>

- 1  
2  
3 • *A wave of adolescents will require HIV treatment* – Identified adolescents who entered care  
4 in childhood (likely perinatally-infected) and adolescents who entered care in their later  
5 teenage years (likely infected via sexual transmission). A 10- to 20-fold increase in the  
6 numbers of adolescents on ART from 2004-2007 to 2012-2014 was found and resulting in a  
7 “wave” of 15-19 year-olds who will require HIV treatment over the next decade due to both  
8 the aging of perinatally-infected children into adolescence and increased numbers of  
9 adolescent girls seeking HIV care for the first time.<sup>33</sup>  
10  
11
- 12 • *Viral monitoring for treatment failure* – VL monitoring is conducted to identify patients at  
13 risk for treatment failure, to target these patients with adherence counseling, and to switch  
14 them to second-line therapy if needed. Comparing outcomes among patients with VL  
15 results just above vs. just below the 1000 copies/mL<sup>3</sup> threshold, we found that while having  
16 a VL>1000 increases the probability of follow-up VL monitoring, most patients with elevated  
17 VL do not receive monitoring within recommended timelines.<sup>34,35</sup>  
18  
19  
20  
21  
22  
23  
24  
25  
26  
27  
28  
29  
30  
31  
32  
33  
34  
35  
36  
37

### 38 **STRENGTHS AND LIMITATIONS**

39  
40 The main strength of the NHLS National HIV Cohort is its size and scope. With millions of  
41 patients over many years, the cohort can be used to conduct robust evaluations of policy  
42 change in South Africa’s public-sector treatment programme. It can also be used to take  
43 advantage of variation in program implementation (e.g. increases in HIV testing in some areas  
44 before others, or implementation of the National Adherence Strategy) to evaluate the impacts  
45 of these interventions<sup>36</sup>.  
46  
47  
48  
49  
50  
51  
52  
53  
54  
55  
56  
57  
58  
59  
60

1  
2  
3 Second, the cohort is unique in its ability to explore outcomes without the problem of silent  
4 transfers.<sup>37</sup> Silent transfers, patients who move from one facility to another without informing  
5 their sending clinic, leads to overestimates of attrition from HIV care and misclassification of  
6 outcomes in programmatic evaluations. Because the cohort contains information on the clinic  
7 where the lab investigation was conducted, we are able to identify movement between clinics  
8 and not misclassify these movements as lost to follow-up.  
9

10  
11  
12  
13  
14  
15  
16  
17  
18 Third, the cohort contains patient data prior to the initiation of ART: essential for assessing the  
19 impact of policy changes on outcomes both before and after treatment—something few clinical  
20 cohorts in South Africa capture<sup>38</sup>.  
21  
22  
23  
24  
25

26  
27 A weakness of the cohort is that it is limited to laboratory results with limited demographic  
28 information and no clinical visit or pharmacy information. While we have been able to  
29 overcome some of these limitations through imputation of ART start dates<sup>39</sup>, we do not have  
30 data on medication or visit adherence, or clinical diagnoses that would be useful for describing  
31 a national program.  
32  
33  
34  
35  
36  
37

38  
39  
40 Second, the matching techniques we use are not perfect and lead to both over- and under-  
41 matching of patient records, which potentially could lead to biased findings. Because the  
42 dataset is so large, random error is typically approaching zero in any analysis. This makes  
43 systematic errors (like the over- and under-matching) the main source of error in studies using  
44 this cohort, a problem that can be explicitly modelled using quantitative bias analysis.<sup>40</sup> We  
45 have also assessed the sensitivity of our results to matching parameters and found the results  
46 to be quite robust.<sup>28</sup>  
47  
48  
49  
50  
51  
52  
53  
54  
55  
56  
57  
58  
59  
60

1  
2  
3 Third, as with other clinical databases, data collection is part of routine clinical care. This means  
4 that if patients do not present for care, we cannot observe their CD4 or VL. Further, adherence  
5 to laboratory monitoring guidelines may vary across facilities, which may contribute to  
6 differences in outcomes across facilities.  
7  
8  
9  
10  
11  
12

13  
14 Finally, the cohort does not have data on death and is unable to link to the National Vital  
15 Registration System to obtain mortality data due to the paucity of national ID numbers  
16 collected. This means that we are currently not able to describe the impact of interventions and  
17 policy changes on mortality. Instead we use other indicators of poor outcomes such as  
18 unsuppressed VL, failure to gain CD4 cell count, and attrition from care.  
19  
20  
21  
22  
23  
24  
25  
26  
27

### 28 **Future Plans**

29  
30 Our future plans for the cohort fall into three categories all with the aim of enhancing the  
31 research and clinical value of the cohort: 1) continuous updating of the cohort; 2) integrate the  
32 cohort with clinical databases, and 3) expand the scope of cohort to include tuberculosis and  
33 other lab-monitored comorbidities.  
34  
35  
36  
37  
38  
39  
40

41 **Collaboration:** Access to primary data is subject to restrictions owing to privacy and ethics  
42 policies set by the South African Government. Requests for access to the data can be made to  
43 the National Health Laboratory Services directly (<http://www.aarms.nhls.ac.za>) and require a  
44 full protocol submission. Inquiries can be made via the Office of Academic Affairs and Research  
45 at the National Health Laboratory Service. To find out more about the cohort, contact  
46 academic.research@nhls.ac.za.  
47  
48  
49  
50  
51  
52  
53  
54  
55  
56  
57  
58  
59  
60

1  
2  
3 **Ethics clearance:** We received ethics clearance from the Wits HREC (M150429) and Boston  
4  
5 University IRB (H-31968, H-33442).  
6  
7

8  
9 **Patient and Public Involvement:** Patients or the public were not involved in the design, or  
10  
11 conduct, or reporting, or dissemination plans of our research.  
12  
13

14  
15 **Acknowledgements:** Jaco Grobler was instrumental in programming the first iteration of the  
16  
17 NHLS unique patient ID which was the genesis for this work. The authors are also grateful for  
18  
19 the advice and technical assistance of Naseem Cassim concerning details of the CDW  
20  
21 architecture. The authors would like to acknowledge the contributions of the dedicated staff at  
22  
23 the National Health Laboratory Service Corporate Data Warehouse for their support and  
24  
25 assistance with data extracts and staff of the National Priority Programme for maintaining a  
26  
27 service that ensures the generation of good quality assay results.  
28  
29  
30

31  
32 **Funding Acknowledgments:** This work was supported by grants R01AI115979, R01-AI152149,  
33  
34 K01MH105320, K01DK116929-01, and R01-HD084233 from the National Institutes of Health.  
35  
36  
37 WBM and SC were supported by USAID through Cooperative Agreement AID- 674-A-12-0020.  
38  
39 The funders had no role in study design, data collection and analysis, decision to publish, or  
40  
41 preparation of the manuscript.  
42  
43  
44

45  
46 **Competing interests:** The authors have declared that no competing interests exist.  
47  
48

49  
50 **Contributorship:** WM, JB, MM, MF, and CN wrote the manuscript. WM, JB, SC, KM, WS and SC  
51  
52 conceptualized the creation of the laboratory cohort. WM, JB, SC, MM, KB, AB, JP, and DO  
53  
54  
55  
56  
57  
58  
59  
60

1  
2  
3 conducted analyses contributing to the creation of the cohort. All authors read and approved  
4  
5 the final manuscript.  
6  
7  
8  
9  
10  
11  
12  
13  
14  
15  
16  
17  
18  
19  
20  
21  
22  
23  
24  
25  
26  
27  
28  
29  
30  
31  
32  
33  
34  
35  
36  
37  
38  
39  
40  
41  
42  
43  
44  
45  
46  
47  
48  
49  
50  
51  
52  
53  
54  
55  
56  
57  
58  
59  
60

For peer review only



## References

1. UNAIDS. *UNAIDS Data 2019 Annual Report*. Geneva; 2019.
2. Marinda E, Simbayi L, Zuma K, et al. Towards achieving the 90–90–90 HIV targets: Results from the south African 2017 national HIV survey. *BMC Public Health*. 2020;20(1):1-12. doi:10.1186/s12889-020-09457-z
3. Fox MP, Maskew M, Macphail a P, et al. Cohort Profile: The Themba Lethu Clinical Cohort, Johannesburg, South Africa. *Int J Epidemiol*. March 2012:6-8. doi:10.1093/ije/dys029
4. Haas AD, Zaniewski E, Anderegg N, et al. Retention and mortality on antiretroviral therapy in sub-Saharan Africa: Collaborative analyses of HIV treatment programmes: Collaborative. *J Int AIDS Soc*. 2018;21(2):1-7. doi:10.1002/jia2.25084
5. Egger M, Ekouevi DK, Williams C, et al. Cohort Profile: The international epidemiological databases to evaluate AIDS (IeDEA) in sub-Saharan Africa. *Int J Epidemiol*. May 2011. doi:10.1093/ije/dyr080
6. Houlihan CF, Bland RM, Mutevedzi PC, et al. Cohort profile: Hlabisa HIV treatment and care programme. *Int J Epidemiol*. 2011;40(2):318-326. doi:10.1093/ije/dyp402
7. Kluberg SA, Fox MP, LaValley M, Pillay D, Bärnighausen T, Bor J. Do HIV treatment eligibility expansions crowd out the sickest? Evidence from rural South Africa. *Trop Med Int Heal*. 2018;23(9):968-979. doi:10.1111/tmi.13122

- 1  
2  
3 8. Bor J, Chiu C, Ahmed S, et al. Failure to initiate HIV treatment in patients with high CD4  
4  
5 counts: evidence from demographic surveillance in rural South Africa. *Trop Med Int Heal*.  
6  
7 2018;23(2):206-220. doi:10.1111/tmi.13013  
8  
9
- 10  
11 9. Macleod WB, Maskew M, Jaffray I, Macphail AP, Ive P, Fox MP. The Feasibility of Using  
12  
13 Screening Criteria to Reduce Clinic Visits for Stable Patients on Antiretroviral Therapy in  
14  
15 South Africa. *J Acquir Immune Defic Syndr*. October 2012.  
16  
17 doi:10.1097/QAI.0b013e318278e976  
18  
19
- 20  
21 10. Fox MP, Shearer K, Maskew M, et al. Treatment outcomes after 7 years of public-sector  
22  
23 HIV treatment. *AIDS*. 2012;26(14):1823-1828. doi:10.1097/QAD.0b013e328357058a  
24  
25  
26
- 27  
28 11. Brennan AT, Maskew M, Ive P, et al. Increases in regimen durability associated with the  
29  
30 introduction of tenofovir at a large public-sector clinic in Johannesburg, South Africa. *J Int*  
31  
32 *AIDS Soc*. 2013;16:1-12. doi:10.7448/IAS.16.1.18794  
33  
34  
35
- 36  
37 12. Haas AD, Johnson LF, Grimsrud A, et al. Extending Visit Intervals for Clinically Stable  
38  
39 Patients on Antiretroviral Therapy: Multicohort Analysis of HIV Programs in Southern  
40  
41 Africa. *J Acquir Immune Defic Syndr*. 2019;81(4):439-447.  
42  
43 doi:10.1097/QAI.0000000000002060  
44  
45
- 46  
47 13. Osler M, Hilderbrand K, Hennessey C, et al. A three-tier framework for monitoring  
48  
49 antiretroviral therapy in high HIV burden settings. *J Int AIDS Soc*. 2014;17.  
50  
51 doi:10.7448/IAS.17.1.18908  
52  
53
- 54  
55 14. Virnig BA, McBean M. Administrative Data for Public Health Surveillance and Planning.  
56  
57

- 1  
2  
3 *Annu Rev Public Health*. 2001;22(1):213-230. doi:10.1146/annurev.publhealth.22.1.213  
4  
5  
6  
7 15. Lee CH, Yoon HJ. Medical big data: Promise and challenges. *Kidney Res Clin Pract*.  
8  
9 2017;36(1):3-11. doi:10.23876/j.krcp.2017.36.1.3  
10  
11  
12 16. NHLS. National CD4 Testing Programme. [https://www.nhls.ac.za/priority-](https://www.nhls.ac.za/priority-programmes/cd4/)  
13  
14 programmes/cd4/. Accessed December 23, 2021.  
15  
16  
17  
18 17. Fellegi I, Sunter A. A Theory for Record Linkage. *J Am Stat Assoc*. 1969;40:1183–1210.  
19  
20  
21 18. Jaro MA. Probabilistic linkage of large public health data files. *Stat Med*. 1995.  
22  
23 doi:10.1002/sim.4780140510  
24  
25  
26  
27 19. Winkler WE. String Comparator Metrics and Enhanced Decision Rules in the Fellegi-  
28  
29 Sunter Model of Record Linkage. *Proc Sect Surv Res Am Stat Assoc*. 1990.  
30  
31 doi:10.1007/978-1-4612-2856-1\_101  
32  
33  
34  
35 20. Bor J, MacLeod W, Oleinik K, et al. Building a National HIV Cohort from Routine  
36  
37 Laboratory Data: Probabilistic Record-Linkage with Graphs. *bioRxiv*. 2018:450304.  
38  
39 doi:10.1101/450304  
40  
41  
42  
43 21. UNAIDS. *Country Factsheets South Africa | 2018*. Geneva; 2018.  
44  
45  
46  
47 22. South African National Department of Health. 2019 ART Clinical Guidelines for the  
48  
49 Management of HIV in Adults, Pregnancy, Adolescents, Children, Infants and Neonates.  
50  
51 2019;(March):26.  
52  
53  
54  
55 23. South African National Department of Health. *National Antiretroviral Treatment*  
56  
57  
58  
59  
60

- 1  
2  
3 *Guidelines*. Vol 328.; 2004. doi:10.1136/bmj.328.7434.280  
4  
5  
6  
7 24. South African National Department of Health. *The South African Antiretroviral Treatment*  
8  
9 *Guidelines 2010.*; 2010.  
10  
11  
12 25. South African National Department of Health. *The South African Antiretroviral Treatment*  
13  
14 *Guidelines 2013.*; 2013.  
15  
16  
17  
18 26. South African National Department of Health. National consolidated guidelines for the  
19  
20 prevention of mother-to-child transmission of HIV (PMTCT) and the management of HIV  
21  
22 in children, adolescents and adults. 2015;(January).  
23  
24  
25  
26 27. South African National Department of Health. *Circular on the Implementation of the*  
27  
28 *Universal Test and Treat Strategy for HIV Positive Patients and Differentiated Care for*  
29  
30 *Stable Patients*. Pretoria, South Africa; 2016.  
31  
32  
33  
34 28. Fox MP, Bor J, Brennan AT, et al. Estimating retention in HIV care accounting for patient  
35  
36 transfers: A national laboratory cohort study in South Africa. *PLoS Med*.  
37  
38 2018;15(6):e1002589. doi:10.1371/journal.pmed.1002589  
39  
40  
41  
42 29. MacLeod W, Bor J, Crawford K, Carmona S. *Analysis of Big Data for Better Targeting of*  
43  
44 *ART Adherence Strategies: Spatial Clustering Analysis of Viral Load Suppression by South*  
45  
46 *African Province, District, Sub-District and Facility (April 2014-March 2015)*. Pretoria,  
47  
48 South Africa; 2015.  
49  
50  
51  
52  
53 30. Bor J, Gage A, Onoya D, Maskew M, Tripodis Y, Fox MP, Puren A, Carmona S, Mlisana K  
54  
55 MW. Quality of Care in South African Facilities Providing ART Services. *PLoS Med*.  
56  
57  
58  
59  
60

- 1  
2  
3 2021;18(3).  
4  
5  
6  
7 31. Carmona S, Bor J, Nattey C, et al. Persistent High Burden of Advanced HIV Disease Among  
8  
9 Patients Seeking Care in South Africa's National HIV Program: Data From a Nationwide  
10  
11 Laboratory Cohort. *Clin Infect Dis*. 2018;66(suppl\_2):S111-S117. doi:10.1093/cid/ciy045  
12  
13  
14  
15 32. J B, MP F, C N, et al. Late presentation persists under UTT in South Africa: a national  
16  
17 cohort study. In: *Conference on Retroviruses and Opportunistic Infections*. Boston,  
18  
19 Massachusetts; 2020.  
20  
21  
22  
23 33. Maskew M, Bor J, MacLeod W, Carmona S, Sherman GG, Fox MP. Adolescent HIV  
24  
25 treatment in South Africa's national HIV programme: a retrospective cohort study. *lancet*  
26  
27 *HIV*. 2019;6(11):e760-e768. doi:10.1016/S2352-3018(19)30234-6  
28  
29  
30  
31 34. Harlow AF, Bor J, Brennan AT, et al. Impact of Viral Load Monitoring on Retention and  
32  
33 Viral Suppression: A Regression Discontinuity Analysis of South Africa's National  
34  
35 Laboratory Cohort. *Am J Epidemiol*. 2020;27708(February):1-19.  
36  
37  
38 doi:10.1093/aje/kwaa140  
39  
40  
41  
42 35. Fox MP, Brennan AT, Nattey C, et al. Delays in repeat HIV viral load testing for those with  
43  
44 elevated viral loads: a national perspective from South Africa. *J Int AIDS Soc*.  
45  
46 2020;23(7):e25542. doi:10.1002/jia2.25542  
47  
48  
49  
50 36. Fox MP, Nattey C, Maskew M, MacLeod W, Brennan A BJ. *Impact of South Africa's*  
51  
52 *National HIV Testing Campaign on Numbers Enrolling in Care: HE2RO Policy Brief Number*  
53  
54 35. Health Economics and Epidemiology Research Office, Johannesburg, South Africa;  
55  
56  
57  
58  
59  
60

- 1  
2  
3 2020.  
4  
5  
6  
7 37. Hallett TB, Eaton JW. A side door into care cascade for HIV-infected patients? *J Acquir*  
8  
9 *Immune Defic Syndr.* 2013;63 Suppl 2:S228-32. doi:10.1097/QAI.0b013e318298721b  
10  
11  
12 38. Bor J, Fox MP, Rosen S, et al. Treatment eligibility and retention in clinical HIV care: A  
13  
14 regression discontinuity study in South Africa. *PLoS Med.* 2017;14(11):1-20.  
15  
16 doi:10.1371/journal.pmed.1002463  
17  
18  
19  
20 39. Maskew M, Bor J, Hendrickson C, et al. Imputing HIV treatment start dates from routine  
21  
22 laboratory data in South Africa: a validation study. *BMC Health Serv Res.* 2017;17(1):41.  
23  
24 doi:10.1186/s12913-016-1940-2  
25  
26  
27  
28 40. Lash TL, Fox MP, Fink AK. *Applying Quantitative Bias Analysis to Epidemiologic Data.*  
29  
30 Dordrecht, Heidelberg, London, New York: Springer; 2009.  
31  
32  
33  
34  
35  
36  
37  
38  
39  
40  
41  
42  
43  
44  
45  
46  
47  
48  
49  
50  
51  
52  
53  
54  
55  
56  
57  
58  
59  
60

1  
2  
3  
4  
5  
6  
7  
8  
9  
10  
11  
12  
13  
14  
15  
16  
17  
18  
19  
20  
21  
22  
23  
24  
25  
26  
27  
28  
29  
30  
31  
32  
33  
34  
35  
36  
37  
38  
39  
40  
41  
42  
43  
44  
45  
46  
47  
48  
49  
50  
51  
52  
53  
54  
55  
56  
57  
58  
59  
60

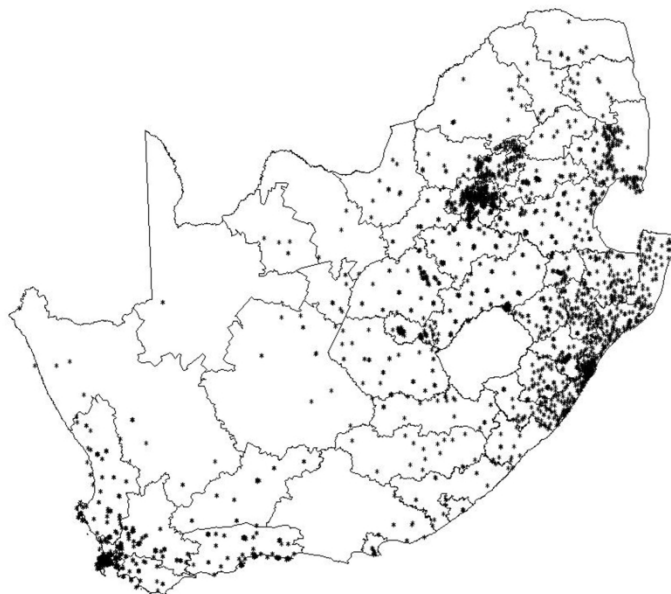

Figure 1. Location of health facilities providing HIV VL tests from May 1, 2017 to April 30, 2018. A total of 4,839 facilities in the NHLS database that provided HIV VL tests during the time period May 1, 2017 to April 30, 2018. 4,751 had valid longitude and latitude values and are represented in this map. Each asterisk represents one facility.

226x151mm (300 x 300 DPI)

1  
2  
3  
4  
5  
6  
7  
8  
9  
10  
11  
12  
13  
14  
15  
16  
17  
18  
19  
20  
21  
22  
23  
24  
25  
26  
27  
28  
29  
30  
31  
32  
33  
34  
35  
36  
37  
38  
39  
40  
41  
42  
43  
44  
45  
46  
47  
48  
49  
50  
51  
52  
53  
54  
55  
56  
57  
58  
59  
60

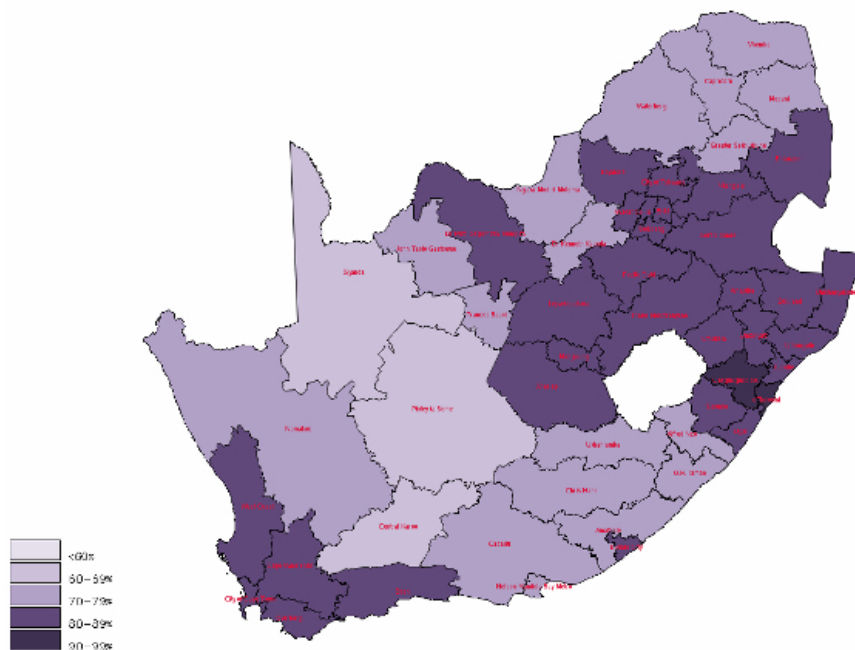

Figure 2. Viral load suppression by district South Africa, May 1, 2017 to April 30, 2018.

228x152mm (72 x 72 DPI)



# BMJ Open

## Cohort Profile: The South African National Health Laboratory Service (NHLS) National HIV Cohort

|                                 |                                                                                                                                                                                                                                                                                                                                                                                                                                                                                                                                                                                                                                                                                                                                                                                                                                                                                                                                                                                                                                                                                                                                                                                                                                                                                                                                                                                                                                                                                                                                                                                                                                        |
|---------------------------------|----------------------------------------------------------------------------------------------------------------------------------------------------------------------------------------------------------------------------------------------------------------------------------------------------------------------------------------------------------------------------------------------------------------------------------------------------------------------------------------------------------------------------------------------------------------------------------------------------------------------------------------------------------------------------------------------------------------------------------------------------------------------------------------------------------------------------------------------------------------------------------------------------------------------------------------------------------------------------------------------------------------------------------------------------------------------------------------------------------------------------------------------------------------------------------------------------------------------------------------------------------------------------------------------------------------------------------------------------------------------------------------------------------------------------------------------------------------------------------------------------------------------------------------------------------------------------------------------------------------------------------------|
| Journal:                        | <i>BMJ Open</i>                                                                                                                                                                                                                                                                                                                                                                                                                                                                                                                                                                                                                                                                                                                                                                                                                                                                                                                                                                                                                                                                                                                                                                                                                                                                                                                                                                                                                                                                                                                                                                                                                        |
| Manuscript ID                   | bmjopen-2022-066671.R1                                                                                                                                                                                                                                                                                                                                                                                                                                                                                                                                                                                                                                                                                                                                                                                                                                                                                                                                                                                                                                                                                                                                                                                                                                                                                                                                                                                                                                                                                                                                                                                                                 |
| Article Type:                   | Cohort profile                                                                                                                                                                                                                                                                                                                                                                                                                                                                                                                                                                                                                                                                                                                                                                                                                                                                                                                                                                                                                                                                                                                                                                                                                                                                                                                                                                                                                                                                                                                                                                                                                         |
| Date Submitted by the Author:   | 18-Aug-2022                                                                                                                                                                                                                                                                                                                                                                                                                                                                                                                                                                                                                                                                                                                                                                                                                                                                                                                                                                                                                                                                                                                                                                                                                                                                                                                                                                                                                                                                                                                                                                                                                            |
| Complete List of Authors:       | <p>MacLeod, William; Boston University School of Public Health, Department of Global Health; University of the Witwatersrand, Health Economics and Epidemiology Research Office</p> <p>Bor, Jacob; Boston University School of Public Health, Departments of Global Health and Epidemiology; Boston University School of Public Health, Department of Global Health</p> <p>Candy, Sue; National Institute for Communicable Diseases</p> <p>Maskew, Mhairi; University of the Witwatersrand, Health Economics and Epidemiology Research Office</p> <p>Fox, Matthew; Boston University School of Public Health, Departments of Global Health and Epidemiology; University of the Witwatersrand, Health Economics and Epidemiology Research Office</p> <p>Bulekova, Katia; Boston University</p> <p>Brennan, Alana; Boston University School of Public Health, Departments of Global Health and Epidemiology; University of the Witwatersrand, Health Economics and Epidemiology Research Office</p> <p>Potter, James; Boston University School of Public Health, Department of Global Health</p> <p>Nattey, Cornelius; University of the Witwatersrand, Health Economics and Epidemiology Research Office</p> <p>Onoya, Dorina; University of the Witwatersrand, Health Economics and Epidemiology Research Office</p> <p>Mlisana, Koleka; National Health Laboratory Service</p> <p>Stevens, Wendy; University of the Witwatersrand, Department of Molecular Medicine and Haematology; National Health Laboratory Service</p> <p>Carmona, Sergio; University of the Witwatersrand, Department of Molecular Medicine and Haematology</p> |
| <b>Primary Subject Heading</b>: | HIV/AIDS                                                                                                                                                                                                                                                                                                                                                                                                                                                                                                                                                                                                                                                                                                                                                                                                                                                                                                                                                                                                                                                                                                                                                                                                                                                                                                                                                                                                                                                                                                                                                                                                                               |
| Secondary Subject Heading:      | Epidemiology                                                                                                                                                                                                                                                                                                                                                                                                                                                                                                                                                                                                                                                                                                                                                                                                                                                                                                                                                                                                                                                                                                                                                                                                                                                                                                                                                                                                                                                                                                                                                                                                                           |
| Keywords:                       | HIV & AIDS < INFECTIOUS DISEASES, Public health < INFECTIOUS DISEASES, EPIDEMIOLOGY                                                                                                                                                                                                                                                                                                                                                                                                                                                                                                                                                                                                                                                                                                                                                                                                                                                                                                                                                                                                                                                                                                                                                                                                                                                                                                                                                                                                                                                                                                                                                    |
|                                 |                                                                                                                                                                                                                                                                                                                                                                                                                                                                                                                                                                                                                                                                                                                                                                                                                                                                                                                                                                                                                                                                                                                                                                                                                                                                                                                                                                                                                                                                                                                                                                                                                                        |

1  
2  
3  
4  
5  
6  
7  
8  
9  
10  
11  
12  
13  
14  
15  
16  
17  
18  
19  
20  
21  
22  
23  
24  
25  
26  
27  
28  
29  
30  
31  
32  
33  
34  
35  
36  
37  
38  
39  
40  
41  
42  
43  
44  
45  
46  
47  
48  
49  
50  
51  
52  
53  
54  
55  
56  
57  
58  
59  
60

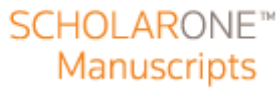



I, the Submitting Author has the right to grant and does grant on behalf of all authors of the Work (as defined in the below author licence), an exclusive licence and/or a non-exclusive licence for contributions from authors who are: i) UK Crown employees; ii) where BMJ has agreed a CC-BY licence shall apply, and/or iii) in accordance with the terms applicable for US Federal Government officers or employees acting as part of their official duties; on a worldwide, perpetual, irrevocable, royalty-free basis to BMJ Publishing Group Ltd ("BMJ") its licensees and where the relevant Journal is co-owned by BMJ to the co-owners of the Journal, to publish the Work in this journal and any other BMJ products and to exploit all rights, as set out in our [licence](#).

The Submitting Author accepts and understands that any supply made under these terms is made by BMJ to the Submitting Author unless you are acting as an employee on behalf of your employer or a postgraduate student of an affiliated institution which is paying any applicable article publishing charge ("APC") for Open Access articles. Where the Submitting Author wishes to make the Work available on an Open Access basis (and intends to pay the relevant APC), the terms of reuse of such Open Access shall be governed by a Creative Commons licence – details of these licences and which [Creative Commons](#) licence will apply to this Work are set out in our licence referred to above.

Other than as permitted in any relevant BMJ Author's Self Archiving Policies, I confirm this Work has not been accepted for publication elsewhere, is not being considered for publication elsewhere and does not duplicate material already published. I confirm all authors consent to publication of this Work and authorise the granting of this licence.

## Cohort Profile: The South African National Health Laboratory Service (NHLS)

### National HIV Cohort

William B. MacLeod<sup>1,2,†,\*</sup>, Jacob Bor<sup>1,2,3,†</sup>, Sue Candy<sup>4</sup>, Mhairi Maskew<sup>2</sup>, Matthew P. Fox<sup>1,2,3</sup>, Katia Bulekova<sup>5</sup>, Alana T. Brennan<sup>1,2,3</sup>, James Potter,<sup>1</sup> Cornelius Nattey<sup>2</sup>, Dorina Onoya<sup>2</sup>, Koleka Mlisana<sup>6</sup>, Wendy Stevens<sup>6,7</sup>, Sergio Carmona<sup>7</sup>

#### Affiliations:

<sup>1</sup>Department of Global Health, Boston University School of Public Health, Boston, MA, USA

<sup>2</sup>Health Economics and Epidemiology Research Office, University of the Witwatersrand, Johannesburg, South Africa

<sup>3</sup>Department of Epidemiology, Boston University School of Public Health, Boston, MA, USA

<sup>4</sup>National Institute of Communicable Diseases, Sandringham, South Africa

<sup>5</sup>Research Computing Services, Boston University, USA

<sup>6</sup>National Health Laboratory Service, Sandringham, South Africa

<sup>7</sup>Department of Molecular Medicine and Haematology, University of the Witwatersrand School of Pathology, Johannesburg, South Africa

\*correspondence to: [wmacleod@bu.edu](mailto:wmacleod@bu.edu), 801 Massachusetts Avenue, 3<sup>rd</sup> Floor, Boston, MA 02118

†equal contributions

**Short title:** Cohort Profile: South Africa's NHLS National HIV Cohort

## Abstract

- **Purpose:** South Africa's National Health Laboratory Service (NHLS) National HIV Cohort was established in 2015 to facilitate monitoring, evaluation, and research on South Africa's National HIV Treatment Program. In South Africa, 84.8% of PLHIV know their HIV status, 70.7% are on ART, and 87.4% are virologically suppressed.
- **Participants:** The NHLS National HIV Cohort includes the laboratory data of nearly all patients receiving HIV care in the public sector since April 2004. Patients are included in the cohort if they have received a CD4 count or HIV RNA viral load test. Using an anonymized unique patient identifier that we developed and validated to linked test results, patients are observed prospectively through their laboratory results as they receive HIV care and treatment. Patients in HIV care are seen for laboratory monitoring every 6 to 12 months. Data collected include age, sex, facility location, and test results for CD4 counts, viral loads, and laboratory tests used to screen for potential treatment complications.
- **Findings to date:** From April 2004 through April 2018, 63 million CD4 count and viral load tests were conducted at 5,483 facilities. 12.6 million unique patients had at least one CD4 count or viral load, indicating they had accessed HIV care, and 7.1 million patients received a viral load test indicating they had started ART. The creation of NHLS National HIV Cohort has enabled longitudinal research on all lab-monitored patients in South Africa's national HIV program, including analyses of: 1) patient health at presentation; 2) care outcomes such as "CD4 recovery", "retention in care", and "viral re-suppression"; 3) patterns of transfer and re-entry into care; 4) facility-level variation in care outcomes; and 5) impacts of policies and guideline changes.
- **Future plans:** Continuous updating of the cohort, integration with available clinical data, and expansion to include tuberculosis and other lab-monitored comorbidities.

## STRENGTHS AND LIMITATIONS

### *Strengths*

- Large size and scope—all public sector patients in South Africa.
- We are able to explore outcomes without the problem of silent transfers.
- The cohort contains patient data prior to the initiation of ART: essential for assessing the impact of policy changes on outcomes both before and after treatment.

### *Limitations*

- It is limited to laboratory results with limited demographic information and no clinical visit or pharmacy information.
- The laboratory data doesn't have a unique patient identifier and the matching techniques we use are not perfect and lead to both over- and under-matching of patient records, which potentially could lead to biased findings.

## INTRODUCTION

South Africa has the largest HIV treatment program in the world, with over 4.7 million people currently on antiretroviral therapy (ART).<sup>1</sup> It also has the largest number of people living with HIV but not yet on ART, an estimated 3 million people.<sup>1</sup> Based on the fifth South African national HIV sero-behavioural survey conducted in 2017, 84.8% of people living with HIV were aware of their status, 70.7% of those who know their HIV status were on ART, and 87.4% of those on ART were virologically suppressed.<sup>2</sup> With such high stakes, it is critical to evaluate the impact of the ART program and improve outcomes nationally.

South Africa's National Health Laboratory Service (NHLS) National HIV Cohort was established to facilitate monitoring, evaluation, and research on South Africa's National HIV Care and Treatment Program. The NHLS National HIV Cohort includes the laboratory data of nearly all patients receiving HIV care in the public sector since 2004. Using an anonymized unique patient identifier that we developed and validated, patients can be followed longitudinally through their laboratory results as they progress through the HIV care and treatment cascade. This open, prospective cohort can be used to evaluate changes in HIV treatment guidelines, to assess trends in patient outcomes across space and time, to determine patterns of patient transfer, and to identify areas where outcomes lag behind.

South Africa has conducted a series of five national population-based HIV biomarker surveys since 2002 and a large number of HIV treatment cohorts have been established in South Africa. Analyses of these surveys and cohorts have contributed to our knowledge of HIV treatment outcomes.<sup>2-12</sup> However, the national surveys are only conducted every 4 or 5 years, and the existing cohorts while continuous, also have some drawbacks: they are not nationally

1  
2  
3 representative, most are in urban areas, and reflect long-standing research collaborations that  
4  
5 have resulted in better-than-average patient care. Further, existing cohorts do not  
6  
7 systematically track patients lost to follow-up in order to assess re-engagement in care.  
8  
9

10 TIER.net, the country's HIV patient monitoring platform, is national in scope but has limited  
11  
12 ability to track patients across sites<sup>13</sup>. While collecting data on all HIV patients nationally would  
13  
14 be prohibitively expensive as a research endeavor, routine laboratory data collected in South  
15  
16 Africa's HIV program can be leveraged to construct a cohort for monitoring, evaluation, and  
17  
18 research.<sup>14,15</sup>  
19  
20  
21  
22

23 Since the beginning of the national HIV care and treatment program, NHLS provided nearly all  
24  
25 laboratory testing for the public-sector program (with the exception of KwaZulu Natal Province  
26  
27 which was not fully integrated into NHLS until April 2010). Laboratory testing has been used for  
28  
29 CD4 and VL monitoring, for confirmatory HIV diagnostic testing, and to identify potential ART  
30  
31 complications and contraindications. Specimens for testing are collected from patients at their  
32  
33 care facility and sent to one of 16 laboratories for processing and testing. Results are generated  
34  
35 by testing instruments in real time and sent to the NHLS Corporate Data Warehouse (CDW)  
36  
37 which manages the distribution of results in real-time. All laboratory test results are maintained  
38  
39 within the CDW. All NHLS HIV labs are accredited by the South African National Accreditation  
40  
41 System (SANAS). The NHLS supports the labs with training, site visits, and on-site audits.  
42  
43  
44  
45  
46  
47  
48 Standard operating procedures have been developed and distributed to ensure standardisation  
49  
50 across testing facilities. Laboratory performance on test volumes and turn-around-times are  
51  
52 routinely monitored<sup>16</sup>.  
53  
54  
55  
56  
57  
58  
59  
60

1  
2  
3  
4  
5  
6  
7 The NHLS National HIV Cohort has advantages over clinical cohorts. First, the data come directly  
8  
9 from the source testing platforms and are less vulnerable to data entry errors that occur when  
10  
11 extracting patient charts into databases. Second, the data are lower cost as they are collected  
12  
13 for routine patient care. Third, the cohort offers a system-wide perspective on the national  
14  
15 program in which transfers, drop-out, and re-entry into care can be observed, enabling  
16  
17 evidence generation around national policy decisions. Fourth, the dataset size means that  
18  
19 evaluations are robust and can be used to compare facilities, geographic areas, and  
20  
21 demographic sub-groups. Fifth, because the data reflect all lab-monitored HIV patients  
22  
23 receiving care in the public sector, the cohort reflects public-sector care-seeking patterns.  
24  
25  
26  
27  
28

## 29 **COHORT DESCRIPTION**

### 30 31 32 **Participants in the cohort**

33  
34  
35  
36 The NHLS National HIV Cohort includes all patients presenting for HIV care or treatment and  
37  
38 receiving CD4 and/or HIV viral load (VL) monitoring at nearly all government health facilities in  
39  
40 South Africa, from April 2004 through April 2018. During this period, 63 million CD4 and VL tests  
41  
42 were conducted at 5,483 facilities.  
43  
44  
45

46  
47 A longitudinal cohort requires a patient identifier in order to follow patients over time. National  
48  
49 ID numbers were only available for 2% of the specimens. However, the database contained  
50  
51 sufficient information to link laboratory records to individual patients using probabilistic  
52  
53 matching techniques. We developed a record linkage algorithm to identify unique patients in  
54  
55  
56  
57  
58  
59  
60



1  
2  
3 the NHLS database combining elements of probabilistic linkage approaches with concepts from  
4  
5 network analysis.<sup>17-19</sup> The methodology is reported in detail elsewhere.<sup>20</sup> In the absence of a  
6  
7 true gold standard, we constructed manually-coded datasets for training and validation. We  
8  
9 manually reviewed 58,905 candidate matches of 1,000 randomly sampled laboratory records.  
10  
11 Relative to these manually-coded data, the algorithm had 93.7% sensitivity, indicating that the  
12  
13 algorithm identified all but 6.3% of true matches. The algorithm had 98.6% positive predictive  
14  
15 value, indicating that just 1.4% of algorithm-assigned matches were incorrect. Additionally, for  
16  
17 those specimens linked to a National ID number, the algorithm correctly identified pairs of  
18  
19 records with the same National ID number with 98.5% sensitivity. No linkage is perfect. For  
20  
21 example, patients may present to clinics with different names and dates of birth, in which case  
22  
23 linkage would be impossible. However, we developed a high-performing linkage approach using  
24  
25 the available data in the NHLS database. By creating a validated patient identifier, the linkage  
26  
27 enabled analysis of the NHLS database as an HIV Cohort. The cohort was deidentified after  
28  
29 linkage, and all analyses are conducted using anonymized data.  
30  
31  
32  
33  
34  
35  
36  
37

38 Our record linkage of the CDW data was conducted on 152.5 million total laboratory results  
39  
40 including 63 million CD4 counts and VL from April 2004 through April 2018. The algorithm  
41  
42 assigned these laboratory results to 12,603,979 unique patients with at least one CD4 count or  
43  
44 VL, indicating that these individuals had accessed HIV care. **Table 1** shows the demographics of  
45  
46 the cohort. The cohort was 64.3% female, 33.7% male, and 2.0% unknown gender. The majority  
47  
48 of individuals were 20-49 years old (8.4% had an unknown date of birth), with patients entering  
49  
50 the cohort at a median age of 32 years (IQR 25-41 years). In the most recent 12 months of the  
51  
52 cohort, HIV patients had laboratory tests at 4,751 facilities within South Africa (**Figure 1**).  
53  
54  
55  
56  
57  
58  
59  
60

**Table 1. Sex and age of patients entering into HIV Care from May 2004 to April 2018.**

| Parameter (% (n)) | May 2004<br>to April 2008<br>(n=2,042,315) | May 2008<br>to April 2013<br>(n=5,752,084) | May 2013<br>to April 2018<br>(n=4,809,580) | May 2004<br>to April 2018<br>(n=12,603,979) |
|-------------------|--------------------------------------------|--------------------------------------------|--------------------------------------------|---------------------------------------------|
| Male              | 31.4% (641,534)                            | 32.4% (1,864,287)                          | 36.2% (1,741,698)                          | 33.7% (4,247,519)                           |
| Female            | 66.3% (1,354,605)                          | 65.9% (3,792,924)                          | 61.6% (2,962,984)                          | 64.3% (8,110,513)                           |
| Unknown           | 2.3% (46,176)                              | 1.6% (94,873)                              | 2.2% (104,898)                             | 2.0% (245,947)                              |
| Age Group (years) |                                            |                                            |                                            |                                             |
| 0-4               | 3.5% (71,011)                              | 2.8% (162,706)                             | 2.3% (111,735)                             | 2.7% (345,452)                              |
| 5-9               | 1.4% (28,358)                              | 1.4% (78,910)                              | 1.0% (49,771)                              | 1.2% (157,039)                              |
| 10-14             | 0.6% (11,889)                              | 1.0% (60,280)                              | 1.1% (54,329)                              | 1.0% (126,498)                              |
| 15-19             | 2.8% (57,167)                              | 3.8% (216,482)                             | 4.4% (211,731)                             | 3.9% (485,380)                              |
| 20-24             | 11.2% (229,680)                            | 11.5% (662,334)                            | 11.5% (551,815)                            | 11.5% (1,443,829)                           |
| 25-29             | 17.7% (360,484)                            | 16.8% (965,872)                            | 15.6% (751,784)                            | 16.5% (2,078,140)                           |
| 30-34             | 18.3% (374,633)                            | 15.9% (917,420)                            | 15.7% (755,664)                            | 16.2% (2,047,717)                           |
| 35-39             | 14.1% (287,302)                            | 13.3% (763,369)                            | 12.4% (597,389)                            | 13.1% (1,648,060)                           |
| 40-44             | 9.9% (202,827)                             | 9.2% (530,075)                             | 9.3% (448,095)                             | 9.4% (1,180,997)                            |
| 45-49             | 6.4% (131,450)                             | 6.5% (375,617)                             | 6.4% (310,034)                             | 6.5% (817,101)                              |
| 50-54             | 3.9% (79,764)                              | 4.2% (242,140)                             | 4.6% (221,419)                             | 4.3% (543,323)                              |
| 55-59             | 2.0% (41,344)                              | 2.5% (144,966)                             | 3.0% (144,236)                             | 2.6% (330,546)                              |
| 60-64             | 0.9% (17,757)                              | 1.3% (73,998)                              | 1.8% (85,267)                              | 1.4% (177,022)                              |
| 65+               | 0.4% (8,772)                               | 0.6% (33,536)                              | 0.8% (40,675)                              | 0.7% (82,983)                               |

Age is age at first entry into HIV Care--at first CD4 or first VL test.

Of the 12.6 million patients in the cohort, 7.1 million ever initiated ART. To estimate the number of patients currently receiving ART, we limited the cohort to the last 18 months from

1  
2  
3 November 2016 through April 2018. We estimate there were 4.4 million patients receiving ART  
4  
5 as evidenced by VL monitoring during that time period, similar to the 4.7 million on ART  
6  
7 UNAIDS estimated for 2018.<sup>21</sup> The number of patients entering HIV care, initiating HIV  
8  
9 treatment, and actively on HIV treatment by year is shown in **Table 2**. Since 2004-05 the  
10  
11 number with a first VL (a proxy for initiating HIV treatment, in South Africa, only patients on  
12  
13 ART are monitored virologically) has grown from 27,937 to 913,604 per year.  
14  
15

16  
17 We found 4.2 million CD4 and 592,261 VL tests that were unlinked to other tests. Patients in  
18  
19 the cohort that had just a single CD4 and no VL include the large number of patients who  
20  
21 present clinically with HIV, have blood drawn for a CD4, but do not seek follow-up care. Still,  
22  
23 some of these singleton lab results may be “stray” lab results that should have been linked to a  
24  
25 patient. Singleton VL represent 8.3% of all VL tests.  
26  
27  
28  
29

### 30 31 **Participant Follow-Up**

32  
33 In South Africa, as in many countries, HIV care and treatment decisions are informed by routine  
34  
35 laboratory monitoring, as specified in standardized national guidelines.<sup>22</sup> While the cohort lacks  
36  
37 information on clinical visits, pharmacy data, or ART regimen, it is nevertheless possible to  
38  
39 follow important care and treatment decisions through the labs.  
40  
41  
42  
43

44  
45 Within the cohort, follow-up is determined by the dates of CD4 and VL monitoring, as well as  
46  
47 screening for potential treatment complications, known as the ART work-up. Laboratory-based  
48  
49 monitoring of CD4 and VL has been a standard component of national HIV care and treatment  
50  
51  
52  
53  
54  
55  
56  
57  
58  
59

**Table 2. Number of patients entering into HIV Care, receiving first HIV VL test, on ART, and HIV VL suppressed by 12-month period from May 2004 to April 2018.**

| Year (12-month period May 1 to April 30) | Number of patients entering into HIV Care <sup>a</sup> | Number of patients receiving first HIV VL test <sup>b</sup> | Number of patients on ART <sup>c</sup> | Percent HIV VL suppressed out of all VL tests <sup>d</sup> |
|------------------------------------------|--------------------------------------------------------|-------------------------------------------------------------|----------------------------------------|------------------------------------------------------------|
| 2004-05                                  | 118,829                                                | 27,937                                                      | 24,208                                 | 31.1                                                       |
| 2005-06                                  | 219,942                                                | 111,865                                                     | 120,796                                | 39.4                                                       |
| 2006-07                                  | 302,510                                                | 176,979                                                     | 272,078                                | 43.4                                                       |
| 2007-08                                  | 344,935                                                | 223,188                                                     | 420,542                                | 50.3                                                       |
| 2008-09                                  | 410,563                                                | 283,929                                                     | 609,729                                | 55.4                                                       |
| 2009-10                                  | 479,406                                                | 249,971                                                     | 716,555                                | 65.7                                                       |
| 2010-11                                  | 915,898                                                | 525,457                                                     | 1,066,016                              | 72.3                                                       |
| 2011-12                                  | 713,101                                                | 582,175                                                     | 1,465,428                              | 72.2                                                       |
| 2012-13                                  | 626,296                                                | 672,543                                                     | 1,875,968                              | 74.0                                                       |
| 2013-14                                  | 619,396                                                | 715,786                                                     | 2,316,959                              | 74.6                                                       |
| 2014-15                                  | 629,246                                                | 785,503                                                     | 2,801,889                              | 77.1                                                       |
| 2015-16                                  | 666,492                                                | 952,256                                                     | 3,429,148                              | 79.6                                                       |
| 2016-17                                  | 629,754                                                | 919,229                                                     | 3,951,406                              | 79.4                                                       |
| 2017-18                                  | 461,076                                                | 913,604                                                     | 4,419,017                              | 83.2                                                       |

<sup>a</sup>Numbers of patients into HIV Care is the number of patients with a first CD4 or first VL.

<sup>b</sup>Number of patients receiving first HIV VL test is the number of first of VL tests

<sup>c</sup>Number of patients on ART is the number of patients who had a VL test in the 18-month period from November 1, (year – 1) to April 30, (year + 1).

<sup>d</sup>Percent of HIV VL suppressed are  $100 \times (\text{the number of VL} < 400 \text{ cp/ml} / \text{Total number of VL tests})$  during the same 18-month period. Patients who did not receive a viral load test are not included.

1  
2  
3 guidelines during the period of study and a routine part of clinical care. During the period of  
4  
5 observation, patients testing positive for HIV at a health facility have blood drawn for a CD4 on  
6  
7 the same day or shortly thereafter. Thus, a patient's first CD4 test is a reasonable proxy for the  
8  
9 date when a patient was diagnosed as HIV-infected within the health system and presented to  
10  
11 a health facility. At the start of the HIV care program, VL tests were conducted at treatment  
12  
13 initiation, and then every six-months. Since 2010, VL monitoring has been limited to 6- and 12-  
14  
15 months after treatment initiation and annually thereafter. **Table 3** lists the evolving criteria for  
16  
17 ART initiation and ART laboratory monitoring in South Africa from 2004 to 2016.  
18  
19

20  
21 Within the cohort, for patients on treatment, a total of 26.7 million follow-up VL have been  
22  
23 conducted which corresponds to a median (IQR) of 2 (1-5) VL per person. This translates to  
24  
25 23,381,315 total person years of follow-up on HIV treatment for a median (IQR) of 2.1 (1.0-5.0)  
26  
27 years per person.  
28  
29  
30  
31  
32  
33

### 34 **Variables measured**

35  
36 The variables in the NHLS National HIV Cohort are described in **Table 4** along with percent  
37  
38 completeness. The cohort includes the type of test, tests results, test date, and geographic  
39  
40 information along with patient's date of birth and sex. **Table 5** is a frequency listing of test type  
41  
42 by three time periods. The tests included in the cohort includes all CD4, VL, HIV confirmatory  
43  
44 tests (PCR/Elisa), and ART-workup labs for patients receiving HIV care.  
45  
46  
47  
48  
49

50  
51 Despite the lack of clinical and pharmacy data, the cohort can be used to generate a wealth of  
52  
53 information about the national HIV program. Information on facility can be linked to facility  
54  
55 geocodes, which can be mapped (**Figure 1**), aggregated to the local municipality, district, and  
56  
57  
58  
59  
60

**Table 3. Evolving criteria for ART initiation and ART monitoring in South Africa from 2004 to 2016.**

| Year | Guidelines                                                                                                                    | ART Initiation Criteria/CD4 and VL monitoring                                                                                                                                                                                                                                                                                                                                                                                                                                                                                                                                                                                                                                                                                                                                            |
|------|-------------------------------------------------------------------------------------------------------------------------------|------------------------------------------------------------------------------------------------------------------------------------------------------------------------------------------------------------------------------------------------------------------------------------------------------------------------------------------------------------------------------------------------------------------------------------------------------------------------------------------------------------------------------------------------------------------------------------------------------------------------------------------------------------------------------------------------------------------------------------------------------------------------------------------|
| 2004 | National ARV Treatment Guidelines (2004) <sup>23</sup>                                                                        | <p><i>Criteria for ART Initiation</i><br/>           CD4 &lt;200 cells/mm<sup>3</sup> irrespective of stage or WHO Stage IV AIDS-defining illness, irrespective of CD4 count and Patient expresses willingness and readiness to take ART adherently</p> <p><i>ART Monitoring</i><br/>           CD4: Staging and 6 monthly<br/>           VL: Staging and 6 monthly</p>                                                                                                                                                                                                                                                                                                                                                                                                                  |
| 2010 | The South African Antiretroviral Treatment Guidelines 2010 <sup>24</sup>                                                      | <p><i>Criteria for ART Initiation</i><br/>           CD4 count &lt;200cells/mm<sup>3</sup> irrespective of clinical stage or CD4 count &lt;350cells/mm<sup>3</sup> in patients with TB/HIV or Pregnant women or WHO stage IV irrespective of CD4 count or MDR/XDR irrespective of CD4</p> <p><i>Require fast track (i.e. ART initiation within 2 weeks of being eligible)</i><br/>           Pregnant women eligible for lifelong ART; Patients with very low CD4 (&lt;100);<br/>           Stage 4, CD4 count not yet available, or;<br/>           MDR/XDR TB</p> <p><i>ART Monitoring</i><br/>           CD4: Staging, 6 and 12 months and annually thereafter<br/>           VL: 6 and 12 months and annually thereafter</p>                                                         |
| 2011 | Circular on New Criteria for Initiation of Adults on ART at CD4 Count of 350 cells/mm <sup>3</sup> and below. August 26, 2011 | Baseline CD4 for initiation at CD4 < 350 cells/mm <sup>3</sup>                                                                                                                                                                                                                                                                                                                                                                                                                                                                                                                                                                                                                                                                                                                           |
| 2012 | Accelerating Access to ART Services and Uptake (circular) April 17, 2012                                                      | <p><i>Criteria for ART Initiation</i><br/>           CD4 count &lt;350 cells/mm<sup>3</sup> irrespective of clinical stage or patients with TB/HIV irrespective of CD4 count or Pregnant women or WHO stage IV irrespective of CD4 count or MDR/XDR irrespective of CD4</p> <p><i>Require fast track (i.e. Same day ART initiation)</i><br/>           Pregnant women eligible for lifelong ART; Patients with low CD4 (&lt;200);<br/>           Stage 4, CD4 count not yet available, or;<br/>           MDR/XDR TB</p> <p>Screening and treatment of patients with very low CD4 Counts (&lt;100) for cryptococcal infection</p> <p><i>ART Monitoring</i><br/>           CD4: Staging, 12 months and annually thereafter<br/>           VL: 6 and 12 months and annually thereafter</p> |
| 2013 | The South African Antiretroviral Treatment Guidelines 2013 <sup>25</sup>                                                      | <p><i>Criteria for ART Initiation</i><br/>           CD4 count &lt;350 cells/mm<sup>3</sup> irrespective of WHO clinical stage or Irrespective of CD4 count and All types of TB (In patients with TB drug resistant or sensitive, including extra pulmonary TB) and WHO stage 3 or 4 irrespective of CD4 count</p> <p><i>Require fast track (i.e. ART initiation within 7 days of being eligible)</i><br/>           HIV positive women who are pregnant or breast feeding or Patients with low CD4 &lt;200 or Patients with Stage 4, irrespective of CD4 count or Patients with TB/HIV co morbidity with CD4 count &lt; 50 (Patients</p>                                                                                                                                                |

|      |                                                                                                                                                                                     |                                                                                                                                                                                                                                                                                                                                                                                                                                                                                                                                                                                       |
|------|-------------------------------------------------------------------------------------------------------------------------------------------------------------------------------------|---------------------------------------------------------------------------------------------------------------------------------------------------------------------------------------------------------------------------------------------------------------------------------------------------------------------------------------------------------------------------------------------------------------------------------------------------------------------------------------------------------------------------------------------------------------------------------------|
|      |                                                                                                                                                                                     | with Cryptococcus meningitis or TB meningitis (defer ART for 4-6 weeks)<br><i>ART Monitoring</i><br>CD4: Staging and 1 year<br>VL: 6 and 12 months and annually thereafter                                                                                                                                                                                                                                                                                                                                                                                                            |
| 2015 | National consolidated guidelines for the prevention of mother-to-child transmission of HIV (PMTCT) and the management of HIV in children, adolescents and adults 2015 <sup>26</sup> | <i>Criteria for ART Initiation</i><br>CD4 count <500 cells/mm <sup>3</sup> irrespective of WHO clinical stage or All types of TB or WHO stage 3 or 4 or HBV coinfection irrespective of CD4 count<br><i>Immediate Initiation</i><br>All HIV-positive pregnant or breastfeeding women, as long as no active TB<br><i>Require fast track (i.e. ART initiation within 7 days of being eligible)</i><br>Patients with low CD4 <200 or Patients with Stage 4, irrespective of CD4 count<br><i>ART Monitoring</i><br>CD4: Staging and 1 year<br>VL: 6 and 12 months and annually thereafter |
| 2016 | Circular on Implementation of the Universal Test and Treat Strategy for HIV Positive Patients and Differentiated Care for Stable Patients August 22, 2016 <sup>27</sup>             | <i>Criteria for ART Initiation</i><br>All HIV positive adolescents and adults regardless of CD4 count<br><i>ART Monitoring</i><br>CD4 Staging and 1 year.<br>VL monitoring at 6 and 12 months and annually thereafter.                                                                                                                                                                                                                                                                                                                                                                |

**Table 4. Variables in the NHLS National HIV Cohort**

| Variable           | Description                                          | Percent completeness of variable |
|--------------------|------------------------------------------------------|----------------------------------|
| BU_uniq_ID         | Unique patient identifier                            | 100%                             |
| Episode_no         | NHLS Episode identifier                              | 100%                             |
| Sex                | Sex                                                  | 98.0%                            |
| Age                | Age in years at testing date                         | 91.6%                            |
| Province           | Province of health facility where specimen was taken | 99.8%                            |
| District           | District of health facility                          | 99.8%                            |
| Local_Municipality | Local municipality of health facility                | 99.8%                            |
| Facility           | NHLS Facility Code of health facility                | 99.8%                            |
| Ward               | NHLS Ward Code of ward at health facility            | 99.8%                            |
| Test_name          | Type of test (e.g. CD4, VL)                          | 100%                             |
| Test_date          | Date of test                                         | 100%                             |
| Test_result        | Test result                                          | 100%                             |

**Table 5. Frequency of all tests included in the NHLS National HIV Cohort in three time periods, May 2004-April 2018**

| Name of Test               | Use in HIV care                                             | 2004-08   | 2008-13    | 2013-18    | All time periods |
|----------------------------|-------------------------------------------------------------|-----------|------------|------------|------------------|
| Alanine Aminotransferase   | Measure of liver injury and determining choice of ART       | 1,970,138 | 9,301,723  | 9,176,996  | 20,448,857       |
| CD4 Count                  | ART eligibility and disease progression                     | 3,599,594 | 15,483,376 | 17,578,415 | 36,661,385       |
| Serum Cryptococcal Antigen | To detect and prevent cryptococcal meningitis               | 17        | 71,374     | 1,017,903  | 1,089,294        |
| Creatinine Clearance       | Measure of kidney function and determining choice of ART    | 2,880     | 6,113,182  | 25,422,404 | 31,538,466       |
| HIV Elisa Confirmatory     | HIV diagnostic test primarily in infants and young children | 663,518   | 820,322    | 370,465    | 1,854,305        |
| HIV Elisa Screening        | HIV diagnostic test primarily in                            | 1,129,249 | 1,448,212  | 639,528    | 3,216,989        |



|                    |                                                                 |                   |                   |                   |                    |
|--------------------|-----------------------------------------------------------------|-------------------|-------------------|-------------------|--------------------|
|                    | infants and young children                                      |                   |                   |                   |                    |
|                    | children                                                        |                   |                   |                   |                    |
|                    | Measure of overall health                                       | 3,841,090         | 12,318,399        | 14,260,748        | 30,420,237         |
| Hemoglobin         |                                                                 |                   |                   |                   |                    |
|                    | HIV diagnostic test primarily used for HIV diagnosis in infants | 39,706            | 109,079           | 108,212           | 256,997            |
| HIV PCR            |                                                                 |                   |                   |                   |                    |
|                    | Monitoring efficacy of ART therapy                              | 1,120,821         | 6,716,430         | 18,922,454        | 26,759,705         |
| HIV RNA Viral Load |                                                                 |                   |                   |                   |                    |
| <b>Total</b>       |                                                                 | <b>12,367,013</b> | <b>52,382,097</b> | <b>87,497,125</b> | <b>152,246,235</b> |

For peer review only

1  
2  
3 provincial levels, or linked to external population-level data such as HIV prevalence, poverty  
4  
5 levels, or the population age distribution. Information on test dates can be used to assess  
6  
7 longitudinal outcomes such as retention in care (18 months without a monitoring lab) at the  
8  
9 patient level, and to assess trends in patient outcomes over time.  
10  
11

### 12 13 14 **Participant attrition**

15  
16  
17 As in other passive surveillance cohorts<sup>5</sup>, attrition from care (and its inverse, “retention in  
18  
19 care”) is a primary outcome of interest. Data are generated through lab monitoring as part of  
20  
21 routine clinical care and no data are collected beyond what is clinically indicated. No efforts are  
22  
23 made by the research team to retain patients in care nor to actively follow-up patients who  
24  
25 have left care. However, accuracy of retention estimates are enhanced by the national  
26  
27 perspective of the cohort which is robust to silent transfers. As the study population includes all  
28  
29 people who have sought public sector care for HIV in South Africa, attrition occurs only if a  
30  
31 person emigrates from South Africa and can no longer seek HIV care.  
32  
33  
34  
35

### 36 37 38 **Patient and Public Involvement**

39  
40  
41 Patients or the public were not involved in the design, or conduct, or reporting, or  
42  
43 dissemination plans of our research.  
44  
45

### 46 47 48 **FINDINGS TO DATE**

49  
50 The ability to link laboratory results to create records of individual patients has enabled 1)  
51  
52 longitudinal patient-level epidemiologic research for the complete national HIV care and  
53  
54 treatment program including patients not yet on ART; 2) assessment of concepts such as “CD4  
55  
56  
57  
58  
59  
60

1  
2  
3 recovery”, “retention in care”, and “viral re-suppression” that require individual-level  
4  
5 longitudinal data and monitoring of these concepts at all public-sector facilities nationally; 3)  
6  
7 tracking of patients as they seek care at different clinics within the health system and assessing  
8  
9 patterns of transfer; 4) evaluation of policies and guideline changes. Finally, linkage with facility  
10  
11 geocodes has enabled integration of the cohort with publicly available data on outcomes and  
12  
13 exposures at the facility or district level, including programmatic data (e.g. clinic staffing, size)  
14  
15 and population-based data (e.g. population density, poverty, HIV prevalence, and mortality).  
16  
17  
18  
19  
20

21 Key findings from the NHLS National HIV Cohort include the following:  
22  
23

- 24 • *Retention in HIV care is underestimated by not accounting for within system patient transfer*  
25  
26 – Estimated retention in HIV care from both the initiating clinic and a national perspective.  
27  
28 At the clinic level retention in care was 29.1% by 6 years. However, when accounting for  
29  
30 transfers to other clinics, retention in care was 63.3% by 6 years.<sup>28</sup>  
31  
32  
33  
34
- 35 • *There is large spatial heterogeneity in the HIV care cascade* – Estimated rates of VL testing  
36  
37 and suppression from April 2014 through March 2015 across public facilities. We identified  
38  
39 wide spatial variation in VL suppression, ranging from 69 to 82% at the provincial level.<sup>29</sup>  
40  
41 **Figure 2** shows a map of district level estimates of VL suppression. The cohort was also used  
42  
43 to develop a summary measure of quality of care at the facility level based on patients’  
44  
45 longitudinal outcomes in different facilities. Year-to-year, quality was found to be highly  
46  
47 correlated within facilities, but varied widely across facilities.<sup>30</sup>  
48  
49  
50
- 51 • *A high proportion of patients present with advanced disease* – Documented that a  
52  
53 consistently large share (~33%) of patients entered into care with a CD4 <200 cells/uL from  
54  
55  
56  
57  
58  
59  
60

1  
2  
3 2011 to 2016 despite increased CD4 treatment eligibility standards.<sup>31</sup> Late presentation  
4  
5 persisted into the UTT era.<sup>32</sup>  
6  
7

- 8  
9 • *A wave of adolescents will require HIV treatment* – Identified adolescents who entered care  
10 in childhood (likely perinatally-infected) and adolescents who entered care in their later  
11 teenage years (likely infected via sexual transmission). A 10- to 20-fold increase in the  
12 numbers of adolescents on ART from 2004-2007 to 2012-2014 was found and resulting in a  
13 “wave” of 15-19 year-olds who will require HIV treatment over the next decade due to both  
14 the aging of perinatally-infected children into adolescence and increased numbers of  
15 adolescent girls seeking HIV care for the first time.<sup>33</sup>  
16  
17
- 18 • *Viral monitoring for treatment failure* – VL monitoring is conducted to identify patients at  
19 risk for treatment failure, to target these patients with adherence counseling, and to switch  
20 them to second-line therapy if needed. Comparing outcomes among patients with VL  
21 results just above vs. just below the 1000 copies/mL<sup>3</sup> threshold, we found that while having  
22 a VL>1000 increases the probability of follow-up VL monitoring, most patients with elevated  
23 VL do not receive monitoring within recommended timelines.<sup>34,35</sup>  
24  
25  
26  
27  
28  
29  
30  
31  
32  
33  
34  
35  
36  
37  
38  
39  
40  
41  
42

### 43 **STRENGTHS AND LIMITATIONS**

44  
45 The main strength of the NHLS National HIV Cohort is its size and scope. With millions of  
46 patients over many years, the cohort can be used to conduct robust evaluations of policy  
47 change in South Africa’s public-sector treatment programme. It can also be used to take  
48 advantage of variation in program implementation (e.g. increases in HIV testing in some areas  
49  
50  
51  
52  
53  
54  
55  
56  
57  
58  
59  
60

1  
2  
3 before others, or implementation of the National Adherence Strategy) to evaluate the impacts  
4  
5 of these interventions<sup>36</sup>.

6  
7  
8  
9 Second, the cohort is unique in its ability to explore outcomes without the problem of silent  
10  
11 transfers.<sup>37</sup> Silent transfers, patients who move from one facility to another without informing  
12  
13 their sending clinic, leads to overestimates of attrition from HIV care and misclassification of  
14  
15 outcomes in programmatic evaluations. Because the cohort contains information on the clinic  
16  
17 where the lab investigation was conducted, we are able to identify movement between clinics  
18  
19 and not misclassify these movements as lost to follow-up.

20  
21  
22  
23  
24 Third, the cohort contains patient data prior to the initiation of ART: essential for assessing the  
25  
26 impact of policy changes on outcomes both before and after treatment—something few clinical  
27  
28 cohorts in South Africa capture<sup>38</sup>.

29  
30  
31  
32 A weakness of the cohort is that it is limited to laboratory results with limited demographic  
33  
34 information and no clinical visit or pharmacy information. While we have been able to  
35  
36 overcome some of these limitations through imputation of ART start dates<sup>39</sup>, we do not have  
37  
38 data on medication or visit adherence, or clinical diagnoses that would be useful for describing  
39  
40 a national program.

41  
42  
43  
44  
45 Second, the matching techniques we use are not perfect and lead to both over- and under-  
46  
47 matching of patient records, which potentially could lead to biased findings. Because the  
48  
49 dataset is so large, random error is typically approaching zero in any analysis. This makes  
50  
51 systematic errors (like the over- and under-matching) the main source of error in studies using  
52  
53 this cohort, a problem that can be explicitly modelled using quantitative bias analysis.<sup>40</sup> We  
54  
55  
56  
57  
58  
59  
60

1  
2  
3 have also assessed the sensitivity of our results to matching parameters and found the results  
4  
5 to be quite robust.<sup>28</sup>  
6  
7

8  
9 Third, as with other clinical databases, data collection is part of routine clinical care. This means  
10  
11 that if patients do not present for care, we cannot observe their CD4 or VL. Further, adherence  
12  
13 to laboratory monitoring guidelines may vary across facilities, which may contribute to  
14  
15 differences in outcomes across facilities.  
16  
17

18  
19 Finally, the cohort does not have data on death and is unable to link to the National Vital  
20  
21 Registration System to obtain mortality data due to the paucity of national ID numbers  
22  
23 collected. This means that we are currently not able to describe the impact of interventions and  
24  
25 policy changes on mortality. Instead we use other indicators of poor outcomes such as  
26  
27 unsuppressed VL, failure to gain CD4 cell count, and attrition from care.  
28  
29  
30  
31

### 32 33 **Future Plans**

34  
35 Our future plans for the cohort fall into three categories all with the aim of enhancing the  
36  
37 research and clinical value of the cohort: 1) continuous updating of the cohort; 2) integrate the  
38  
39 cohort with clinical databases, and 3) expand the scope of cohort to include tuberculosis and  
40  
41 other lab-monitored comorbidities.  
42  
43  
44

45  
46 **Collaboration:** Access to primary data is subject to restrictions owing to privacy and ethics  
47  
48 policies set by the South African Government. Requests for access to the data can be made to  
49  
50 the National Health Laboratory Services directly (<http://www.aarms.nhls.ac.za>) and require a  
51  
52 full protocol submission. Inquiries can be made via the Office of Academic Affairs and Research  
53  
54  
55  
56  
57  
58  
59  
60

1  
2  
3 at the National Health Laboratory Service. To find out more about the cohort, contact  
4  
5 academic.research@nhls.ac.za.  
6  
7

8  
9 **Ethics clearance:** We received ethics clearance from the Wits HREC (M150429) and Boston  
10  
11 University IRB (H-31968, H-33442).  
12  
13

14  
15 **Acknowledgements:** Jaco Grobler was instrumental in programming the first iteration of the  
16  
17 NHLS unique patient ID which was the genesis for this work. The authors are also grateful for  
18  
19 the advice and technical assistance of Naseem Cassim concerning details of the CDW  
20  
21 architecture. The authors would like to acknowledge the contributions of the dedicated staff at  
22  
23 the National Health Laboratory Service Corporate Data Warehouse for their support and  
24  
25 assistance with data extracts and staff of the National Priority Programme for maintaining a  
26  
27 service that ensures the generation of good quality assay results.  
28  
29  
30

31  
32 **Funding Acknowledgments:** This work was supported by grants R01AI115979, R01AI152149,  
33  
34 K01MH105320, K01DK116929-01, and R01HD084233 from the National Institutes of Health.  
35  
36  
37  
38 WBM and SC were supported by USAID through Cooperative Agreement AID- 674-A-12-0020.  
39  
40 The funders had no role in study design, data collection and analysis, decision to publish, or  
41  
42 preparation of the manuscript.  
43  
44  
45

46  
47 **Competing interests:** The authors have declared that no competing interests exist.  
48  
49

50  
51 **Contributorship:** William B. MacLeod, Jacob Bor, Sue Candy, Mhairi Maskew, Matthew P. Fox,  
52  
53 Katia Bulekova, Alana T. Brennan, James Potter, Wendy Stevens and Sergio Carmona made  
54  
55 substantial contributions to the conception or design of the work.  
56  
57  
58  
59  
60

1  
2  
3 William B. MacLeod, Jacob Bor, Sue Candy, Katia Bulekova, James Potter, Cornelius Nattey,  
4  
5 Dorina Onoya, and Koleka Mlisana made substantial contributions to the acquisition, analysis or  
6  
7 interpretation of data for the work.  
8  
9

10  
11 William B MacLeod, Jacob Bor, Mhari Maskew, Matthew P. Fox, and Cornelius Nattey drafted  
12  
13 the work.  
14  
15

16  
17 Sue Candy, Katia Bulekova, Alana T. Brennan, James Potter, Wendy Stevens, and Sergio  
18  
19 Carmona critically revised the work for important intellectual content.  
20  
21

22  
23 All authors gave final approval of the version to be published, and agree to be accountable for  
24  
25 all aspects of the work in ensuring that questions related to the accuracy or integrity of any part  
26  
27 of the work are appropriately investigated and resolved.  
28  
29



## Figure Legends

**Figure 1. Location of health facilities providing HIV VL tests from May 1, 2017 to April 30, 2018. A total of 4,839 facilities in the NHLS database that provided HIV VL tests during the time period May 1, 2017 to April 30, 2018. 4,751 had valid longitude and latitude values and are represented in this map. Each asterisk represents one facility.**

**Figure 2. Viral load suppression by district South Africa, May 1, 2017 to April 30, 2018.**

For peer review only

## References

1. UNAIDS. *UNAIDS Data 2019 Annual Report*. Geneva; 2019.
2. Marinda E, Simbayi L, Zuma K, et al. Towards achieving the 90–90–90 HIV targets: Results from the south African 2017 national HIV survey. *BMC Public Health*. 2020;20(1):1-12. doi:10.1186/s12889-020-09457-z
3. Fox MP, Maskew M, Macphail a P, et al. Cohort Profile: The Themba Lethu Clinical Cohort, Johannesburg, South Africa. *Int J Epidemiol*. March 2012:6-8. doi:10.1093/ije/dys029
4. Haas AD, Zaniewski E, Anderegg N, et al. Retention and mortality on antiretroviral therapy in sub-Saharan Africa: Collaborative analyses of HIV treatment programmes: Collaborative. *J Int AIDS Soc*. 2018;21(2):1-7. doi:10.1002/jia2.25084
5. Egger M, Ekouevi DK, Williams C, et al. Cohort Profile: The international epidemiological databases to evaluate AIDS (IeDEA) in sub-Saharan Africa. *Int J Epidemiol*. May 2011. doi:10.1093/ije/dyr080
6. Houlihan CF, Bland RM, Mutevedzi PC, et al. Cohort profile: Hlabisa HIV treatment and care programme. *Int J Epidemiol*. 2011;40(2):318-326. doi:10.1093/ije/dyp402
7. Kluberg SA, Fox MP, LaValley M, Pillay D, Bärnighausen T, Bor J. Do HIV treatment eligibility expansions crowd out the sickest? Evidence from rural South Africa. *Trop Med Int Heal*. 2018;23(9):968-979. doi:10.1111/tmi.13122

- 1  
2  
3 8. Bor J, Chiu C, Ahmed S, et al. Failure to initiate HIV treatment in patients with high CD4  
4  
5 counts: evidence from demographic surveillance in rural South Africa. *Trop Med Int Heal*.  
6  
7 2018;23(2):206-220. doi:10.1111/tmi.13013  
8  
9
- 10  
11 9. Macleod WB, Maskew M, Jaffray I, Macphail AP, Ive P, Fox MP. The Feasibility of Using  
12  
13 Screening Criteria to Reduce Clinic Visits for Stable Patients on Antiretroviral Therapy in  
14  
15 South Africa. *J Acquir Immune Defic Syndr*. October 2012.  
16  
17 doi:10.1097/QAI.0b013e318278e976  
18  
19
- 20  
21 10. Fox MP, Shearer K, Maskew M, et al. Treatment outcomes after 7 years of public-sector  
22  
23 HIV treatment. *AIDS*. 2012;26(14):1823-1828. doi:10.1097/QAD.0b013e328357058a  
24  
25  
26
- 27  
28 11. Brennan AT, Maskew M, Ive P, et al. Increases in regimen durability associated with the  
29  
30 introduction of tenofovir at a large public-sector clinic in Johannesburg, South Africa. *J Int*  
31  
32 *AIDS Soc*. 2013;16:1-12. doi:10.7448/IAS.16.1.18794  
33  
34
- 35  
36 12. Haas AD, Johnson LF, Grimsrud A, et al. Extending Visit Intervals for Clinically Stable  
37  
38 Patients on Antiretroviral Therapy: Multicohort Analysis of HIV Programs in Southern  
39  
40 Africa. *J Acquir Immune Defic Syndr*. 2019;81(4):439-447.  
41  
42 doi:10.1097/QAI.0000000000002060  
43  
44
- 45  
46 13. Osler M, Hilderbrand K, Hennessey C, et al. A three-tier framework for monitoring  
47  
48 antiretroviral therapy in high HIV burden settings. *J Int AIDS Soc*. 2014;17.  
49  
50 doi:10.7448/IAS.17.1.18908  
51  
52
- 53  
54 14. Virnig BA, McBean M. Administrative Data for Public Health Surveillance and Planning.  
55  
56  
57

- 1  
2  
3 *Annu Rev Public Health*. 2001;22(1):213-230. doi:10.1146/annurev.publhealth.22.1.213  
4  
5  
6  
7 15. Lee CH, Yoon HJ. Medical big data: Promise and challenges. *Kidney Res Clin Pract*.  
8  
9 2017;36(1):3-11. doi:10.23876/j.krcp.2017.36.1.3  
10  
11  
12 16. NHLS. National CD4 Testing Programme. [https://www.nhls.ac.za/priority-](https://www.nhls.ac.za/priority-programmes/cd4/)  
13  
14 programmes/cd4/. Accessed December 23, 2021.  
15  
16  
17  
18 17. Fellegi I, Sunter A. A Theory for Record Linkage. *J Am Stat Assoc*. 1969;40:1183–1210.  
19  
20  
21 18. Jaro MA. Probabilistic linkage of large public health data files. *Stat Med*. 1995.  
22  
23 doi:10.1002/sim.4780140510  
24  
25  
26  
27 19. Winkler WE. String Comparator Metrics and Enhanced Decision Rules in the Fellegi-  
28  
29 Sunter Model of Record Linkage. *Proc Sect Surv Res Am Stat Assoc*. 1990.  
30  
31 doi:10.1007/978-1-4612-2856-1\_101  
32  
33  
34  
35 20. Bor J, MacLeod W, Oleinik K, et al. Building a National HIV Cohort from Routine  
36  
37 Laboratory Data: Probabilistic Record-Linkage with Graphs. *bioRxiv*. 2018:450304.  
38  
39 doi:10.1101/450304  
40  
41  
42  
43 21. UNAIDS. *Country Factsheets South Africa | 2018*. Geneva; 2018.  
44  
45  
46  
47 22. South African National Department of Health. 2019 ART Clinical Guidelines for the  
48  
49 Management of HIV in Adults, Pregnancy, Adolescents, Children, Infants and Neonates.  
50  
51 2019;(March):26.  
52  
53  
54  
55 23. South African National Department of Health. *National Antiretroviral Treatment*  
56  
57  
58  
59  
60

- 1  
2  
3 *Guidelines*. Vol 328.; 2004. doi:10.1136/bmj.328.7434.280  
4  
5  
6  
7 24. South African National Department of Health. *The South African Antiretroviral Treatment*  
8  
9 *Guidelines 2010.*; 2010.  
10  
11  
12 25. South African National Department of Health. *The South African Antiretroviral Treatment*  
13  
14 *Guidelines 2013.*; 2013.  
15  
16  
17  
18 26. South African National Department of Health. National consolidated guidelines for the  
19  
20 prevention of mother-to-child transmission of HIV (PMTCT) and the management of HIV  
21  
22 in children, adolescents and adults. 2015;(January).  
23  
24  
25  
26 27. South African National Department of Health. *Circular on the Implementation of the*  
27  
28 *Universal Test and Treat Strategy for HIV Positive Patients and Differentiated Care for*  
29  
30 *Stable Patients*. Pretoria, South Africa; 2016.  
31  
32  
33  
34 28. Fox MP, Bor J, Brennan AT, et al. Estimating retention in HIV care accounting for patient  
35  
36 transfers: A national laboratory cohort study in South Africa. *PLoS Med*.  
37  
38 2018;15(6):e1002589. doi:10.1371/journal.pmed.1002589  
39  
40  
41  
42 29. MacLeod W, Bor J, Crawford K, Carmona S. *Analysis of Big Data for Better Targeting of*  
43  
44 *ART Adherence Strategies: Spatial Clustering Analysis of Viral Load Suppression by South*  
45  
46 *African Province, District, Sub-District and Facility (April 2014-March 2015)*. Pretoria,  
47  
48 South Africa; 2015.  
49  
50  
51  
52  
53 30. Bor J, Gage A, Onoya D, Maskew M, Tripodis Y, Fox MP, Puren A, Carmona S, Mlisana K  
54  
55 MW. Quality of Care in South African Facilities Providing ART Services. *PLoS Med*.  
56  
57  
58  
59  
60

- 1  
2  
3 2021;18(3).  
4  
5  
6  
7 31. Carmona S, Bor J, Nattey C, et al. Persistent High Burden of Advanced HIV Disease Among  
8  
9 Patients Seeking Care in South Africa's National HIV Program: Data From a Nationwide  
10  
11 Laboratory Cohort. *Clin Infect Dis*. 2018;66(suppl\_2):S111-S117. doi:10.1093/cid/ciy045  
12  
13  
14  
15 32. J B, MP F, C N, et al. Late presentation persists under UTT in South Africa: a national  
16  
17 cohort study. In: *Conference on Retroviruses and Opportunistic Infections*. Boston,  
18  
19 Massachusetts; 2020.  
20  
21  
22  
23 33. Maskew M, Bor J, MacLeod W, Carmona S, Sherman GG, Fox MP. Adolescent HIV  
24  
25 treatment in South Africa's national HIV programme: a retrospective cohort study. *lancet*  
26  
27 *HIV*. 2019;6(11):e760-e768. doi:10.1016/S2352-3018(19)30234-6  
28  
29  
30  
31 34. Harlow AF, Bor J, Brennan AT, et al. Impact of Viral Load Monitoring on Retention and  
32  
33 Viral Suppression: A Regression Discontinuity Analysis of South Africa's National  
34  
35 Laboratory Cohort. *Am J Epidemiol*. 2020;27708(February):1-19.  
36  
37  
38 doi:10.1093/aje/kwaa140  
39  
40  
41  
42 35. Fox MP, Brennan AT, Nattey C, et al. Delays in repeat HIV viral load testing for those with  
43  
44 elevated viral loads: a national perspective from South Africa. *J Int AIDS Soc*.  
45  
46 2020;23(7):e25542. doi:10.1002/jia2.25542  
47  
48  
49  
50 36. Fox MP, Nattey C, Maskew M, MacLeod W, Brennan A BJ. *Impact of South Africa's*  
51  
52 *National HIV Testing Campaign on Numbers Enrolling in Care: HE2RO Policy Brief Number*  
53  
54 35. Health Economics and Epidemiology Research Office, Johannesburg, South Africa;  
55  
56  
57  
58  
59  
60

- 1  
2  
3 2020.  
4  
5  
6  
7 37. Hallett TB, Eaton JW. A side door into care cascade for HIV-infected patients? *J Acquir*  
8  
9 *Immune Defic Syndr.* 2013;63 Suppl 2:S228-32. doi:10.1097/QAI.0b013e318298721b  
10  
11  
12 38. Bor J, Fox MP, Rosen S, et al. Treatment eligibility and retention in clinical HIV care: A  
13  
14 regression discontinuity study in South Africa. *PLoS Med.* 2017;14(11):1-20.  
15  
16 doi:10.1371/journal.pmed.1002463  
17  
18  
19  
20 39. Maskew M, Bor J, Hendrickson C, et al. Imputing HIV treatment start dates from routine  
21  
22 laboratory data in South Africa: a validation study. *BMC Health Serv Res.* 2017;17(1):41.  
23  
24 doi:10.1186/s12913-016-1940-2  
25  
26  
27  
28 40. Lash TL, Fox MP, Fink AK. *Applying Quantitative Bias Analysis to Epidemiologic Data.*  
29  
30 Dordrecht, Heidelberg, London, New York: Springer; 2009.  
31  
32  
33  
34  
35  
36  
37  
38  
39  
40  
41  
42  
43  
44  
45  
46  
47  
48  
49  
50  
51  
52  
53  
54  
55  
56  
57  
58  
59  
60

1  
2  
3  
4  
5  
6  
7  
8  
9  
10  
11  
12  
13  
14  
15  
16  
17  
18  
19  
20  
21  
22  
23  
24  
25  
26  
27  
28  
29  
30  
31  
32  
33  
34  
35  
36  
37  
38  
39  
40  
41  
42  
43  
44  
45  
46  
47  
48  
49  
50  
51  
52  
53  
54  
55  
56  
57  
58  
59  
60

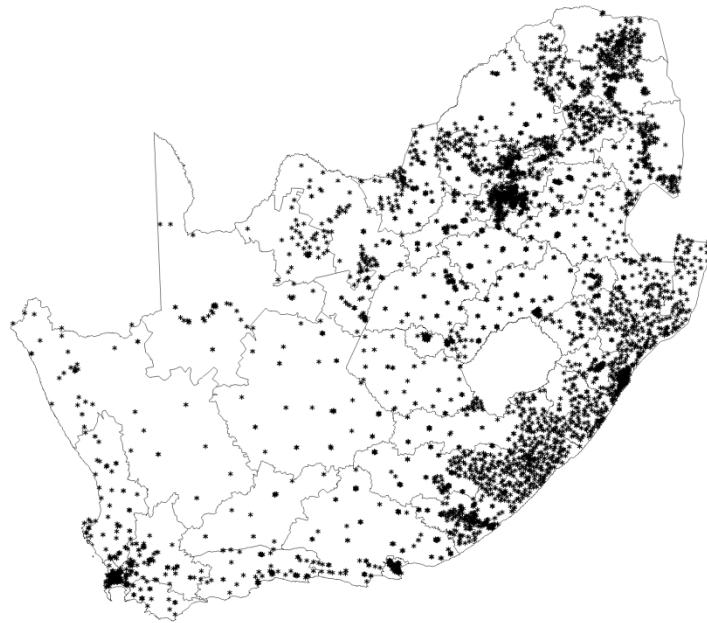

Figure 1. Location of health facilities providing HIV VL tests from May 1, 2017 to April 30, 2018. A total of 4,839 facilities in the NHLS database that provided HIV VL tests during the time period May 1, 2017 to April 30, 2018. 4,751 had valid longitude and latitude values and are represented in this map. Each asterisk represents one facility.

203x135mm (300 x 300 DPI)



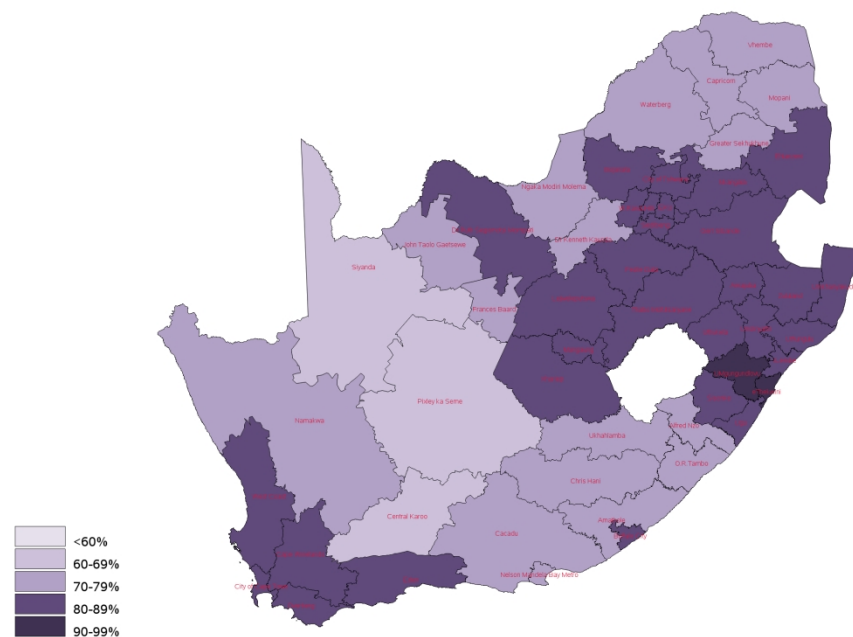

Figure 2. Viral load suppression by district South Africa, May 1, 2017 to April 30, 2018.

516x344mm (118 x 118 DPI)
